1 **TORC1 modulation in adipose tissue is required for organismal adaptation to hypoxia in**  
2 ***Drosophila*.**

3  
4 **Byoungchun Lee, Elizabeth C. Barretto and Savraj S. Grewal<sup>1\*</sup>**

5 <sup>1</sup>Clark H Smith Brain Tumour Centre, Arnie Charbonneau Cancer Institute, Alberta Children's Hospital  
6 Research Institute, and Department of Biochemistry and Molecular Biology Calgary, University of  
7 Calgary, Alberta T2N 4N1, Canada.

8  
9  
10  
11  
12  
13  
14 \*Author for correspondence ([grewalss@ucalgary.ca](mailto:grewalss@ucalgary.ca))

15  
16 KEY WORDS: hypoxia, *Drosophila*, fat body, adipose tissue, TORC1, TSC, lipid metabolism, lipid  
17 droplet,  
18

1 **ABSTRACT**

2 Animals often develop in conditions where environmental conditions such as food, oxygen and  
3 temperature fluctuate. The ability to adapt their metabolism to these fluctuations is important to ensure  
4 normal development and viability. In most animals, low oxygen (hypoxia) is deleterious, however some  
5 animals can alter their physiology to thrive under hypoxia. Here we show that TORC1 modulation in  
6 adipose tissue is required for organismal adaptation to hypoxia in *Drosophila*. We find that hypoxia  
7 rapidly suppresses TORC1 kinase signalling in *Drosophila* larvae via TSC-mediated inhibition of Rheb.  
8 We show that this hypoxia-mediated inhibition of TORC1 specifically in the larval fat body is essential  
9 for viable development to adulthood. Moreover, we find that these effects of TORC1 inhibition on  
10 hypoxia tolerance are mediated through remodeling of fat body lipid droplets and lipid storage. These  
11 studies identify the larval adipose tissue as a key hypoxia sensing tissue that coordinates whole-body  
12 development and survival to changes in environmental oxygen by modulating TORC1 and lipid storage.  
13

## 1 INTRODUCTION

2 Animals often have to grow and survive in conditions where their environment fluctuates. For example,  
3 changes in nutrition, temperature or oxygen availability, or exposure to toxins and stress can all impact  
4 development. Animals must therefore adapt their physiology and metabolism in response to these  
5 environmental challenges in order to ensure proper growth and survival <sup>1,2</sup>.

6  
7 In most animals decreases in oxygen are particularly deleterious. Low oxygen (hypoxia) can lead to  
8 rapid tissue damage and lethality, and oxygen deprivation is a hallmark of diseases such as stroke and  
9 ischemia <sup>3</sup>. However, some animals have evolved to live in oxygen-deprived conditions and  
10 consequently exhibit marked tolerance to hypoxia. For example, birds and aquatic mammals can  
11 tolerate extensive periods of low oxygen without incurring any tissue damage <sup>4,5</sup>. Indeed, some animals  
12 show quite remarkable levels of tolerance to oxygen deprivation: brine shrimp embryos have been  
13 reported to recover from four years of continuous anoxia <sup>6</sup>, while the naked mole rat can survive up to  
14 18 minutes of complete oxygen deprivation, a condition that kills laboratory rodents within about one  
15 minute <sup>7</sup>. Understanding how these animals adapt their metabolism to low oxygen may shed light on  
16 how to protect tissues from hypoxic damage in disease states.

17  
18 *Drosophila* provide an excellent laboratory model system to examine how fluctuations in environmental  
19 conditions influence animal development. In particular, there has been extensive work on how nutrient  
20 availability influences *Drosophila* larval development, the main growth period of the life cycle <sup>8-10</sup>. In  
21 nutrient-rich conditions larvae increase in mass approximately 200-fold over four days before  
22 undergoing metamorphosis to the pupal stage <sup>11,12</sup>. In contrast, when dietary nutrients are limiting, larvae  
23 alter their physiology and metabolism to slow growth and development, and to promote survival. One  
24 main regulator of these nutrient-regulated processes in *Drosophila* is the conserved TOR kinase  
25 signalling pathway <sup>13</sup>. TOR exists in two signalling complexes, TORC1 and TORC2, with TORC1 being  
26 the main growth regulatory TOR complex <sup>14</sup>. A conserved signalling network couples nutrient availability  
27 to the activation TORC1 to control anabolic process important for cell growth and proliferation <sup>14</sup>.  
28 Moreover, studies in *Drosophila* have been instrumental in revealing non-autonomous effects of TORC1  
29 signalling on body growth. For example, nutrient activation of TORC1 in specific larval tissue such as  
30 the fat body, muscle and prothoracic gland, can influence whole animal development through the  
31 control of endocrine signalling via insulin-like peptides and the steroid hormone, ecdysone <sup>9,10,15</sup>. In  
32 addition, TORC1 regulation of autophagy in the larval fat body is important for organismal homeostasis  
33 and survival during periods of nutrient deprivation <sup>16,17</sup>.

34  
35 *Drosophila* larvae are also hypoxia tolerant <sup>18-20</sup>. In their natural ecology, *Drosophila* larvae grow on  
36 rotting food rich in microorganisms, which probably contribute to a low oxygen local environment. Even  
37 in the laboratory, local oxygen levels are low at the food surface of vials containing developing larvae <sup>19</sup>.  
38 *Drosophila* have therefore evolved metabolic and physiological mechanisms to respond to and thrive in  
39 hypoxic conditions. However, compared to our understanding of the nutrient regulation of growth and  
40 homeostasis, considerably less is known about how *Drosophila* adapt to low oxygen during  
41 development. A handful of studies have shown that larval survival in oxygen requires regulation of gene  
42 expression by the transcription factors HIF-1 alpha and ERR alpha, and the repressor, Hairy <sup>21-24</sup>.  
43 Developmental hypoxia sensing and signalling has also been shown to be mediated through a nitric  
44 oxide/cGMP/PKG signalling pathway <sup>25,26</sup>.

45  
46 Here we report a role for modulation of the TOR kinase signalling pathway as a regulator of hypoxia  
47 tolerance during *Drosophila* development. In particular, we find that suppression of TORC1 specifically  
48 in the larval fat body is required for animals to reset their growth and developmental rate in hypoxia, and  
49 to allow viable development to the adult stage. We further show that these effects of TORC1 inhibition  
50 require remodelling of lipid droplet and lipid storage. Our findings implicate the larval fat body as a key  
51 hypoxia-sensing tissue that coordinates whole animal development and survival in response to  
52 changing oxygen levels.

## 53 RESULTS

## 1 Exposure of larvae to hypoxia slows growth and delays development

2 We began by examining the effect of exposing larvae to hypoxia on their growth and development. We  
3 used 5% oxygen as our hypoxia conditions for all experiments in this paper. We allowed embryos to  
4 develop in normoxia and then, upon hatching, larvae were either maintained on food in normoxia or  
5 transferred to food vials in hypoxia chambers that were perfused with a constant supply of  
6 5% oxygen/95% nitrogen. We found that hypoxia led to reduced larval growth rate and larvae took  
7 approximately an extra two days to develop to the pupal stage (Fig 1a). We also found that the hypoxia-  
8 exposed animals had a reduced wandering third instar larval weight (Fig 1b) and reduced final pupal  
9 size (Fig 1c). We found that exposure of larvae to hypoxia did not alter their feeding behaviour (Suppl  
10 Fig 1), suggesting that the decreased growth rate was not simply due to a general reduction in nutrient  
11 intake. Together, these data indicate that *Drosophila* larvae adapt to low oxygen levels by reducing their  
12 growth and slowing their development. These data are consistent with previous reports showing that  
13 moderate levels of hypoxia (10% oxygen) can also affect final body size<sup>20</sup>.

## 14 Hypoxia suppresses TORC1 signalling via TSC1/2.

15 The conserved TORC1 kinase signalling pathway is one of the main regulators of tissue and body  
16 growth in *Drosophila*. TORC1 can be activated by dietary nutrients and growth factors such as insulin.  
17 Mammalian cell culture experiments have also shown that hypoxia can suppress TORC1 activity<sup>27-30</sup>.  
18 We therefore examined whether changes in TORC1 signalling play a role in adaptation to hypoxia in  
19 *Drosophila* larvae. We transferred third instar larvae from normoxia to hypoxia and then measured  
20 TORC1 activity by western blotting using an antibody that recognizes the phosphorylated form of S6  
21 kinase (pS6K), a direct TORC1 kinase target. We found that hypoxia led to a rapid suppression of  
22 whole body TORC1 activity that was apparent within 10-20 minutes of hypoxia exposure (Fig 2a). This  
23 suppression persisted when larvae were maintained in hypoxia for longer periods (48 hours, Suppl Fig  
24 2a). We also examined how different levels of oxygen affected TORC1 activity. Third instar larvae were  
25 transferred from normoxia to different levels of hypoxia (from 20-1% oxygen) for one hour and then  
26 TORC1 activity measured by western blotting for phosphorylated S6K. We found that suppression of  
27 TORC1 occurred at 5 and 3% oxygen but remained unchanged at higher (20 and 10%) or lower (1%)  
28 levels (Fig 2b). We examined this further by exposing larvae to several different concentrations of  
29 oxygen between 1 and 10%, and found that the range within which TORC1 was inhibited was between  
30 2 and 6 % oxygen (suppl Fig 2C). These data indicate that larvae rapidly respond to hypoxia by  
31 suppressing TORC1 signalling, and that this response occurs within a specific range of low  
32 environmental oxygen rather than simply being triggered below a threshold level of low oxygen.

33 We next examined how hypoxia suppresses TORC1 activity. One of the main ways by which TORC1 is  
34 activated is through a TSC1/2-Rheb signalling pathway<sup>14</sup>. Rheb is a small G-protein that binds to and  
35 activates TOR kinase at lysosomes. TSC2 is a GTPase activating protein, and when bound to its  
36 partner TSC1, it inhibits Rheb by converting it from its active GTP-bound state to an inactive GDP-  
37 bound state. Several diverse stimuli including nutrients, growth factors and hypoxia have been shown to  
38 regulate TSC1/2 function and to control TORC1 activity in mammalian cell culture<sup>14</sup>. We therefore  
39 explored a role for TSC1/2 and Rheb in the suppression of TORC1 kinase signalling during larval  
40 hypoxia. We found that ubiquitous overexpression of a *UAS-Rheb* transgene (using daughterless-gal4,  
41 *da-gal4*) was sufficient to prevent the hypoxia-mediated suppression of TORC1 signalling in larvae (Fig  
42 2c). We also found that *tsc1* null mutant (*tsc1<sup>Q87X</sup>*) larvae also were unable to suppress TORC1  
43 signalling when exposed to hypoxia (Fig 2d). Together these data indicate that hypoxic exposure in  
44 larvae inhibits TORC1 by TSC1/2-mediated suppression of Rheb.

45 Studies in mammalian cells have described how hypoxia can induce TSC-mediated TORC inhibition via  
46 the classic HIF-1 alpha transcription factor. In this mechanism, HIF-1 alpha leads to upregulation of  
47 REDD1, an activator of TSC1/2<sup>31</sup>. In *Drosophila*, the homolog of REDD1, Scylla, and its partner protein,  
48 Charybdis, have been shown to inhibit TOR and suppress growth<sup>32</sup>. We therefore examined a role for  
49 Sima (the *Drosophila* HIF-1 alpha homolog) and Scylla/Charybdis in larval hypoxia. However, we found  
50 that *sima* mutants still showed a suppression of TORC1 signalling when exposed to hypoxia (Fig 2e).

1 Similarly, both *scylla* and *charybdis* mutants also showed a similar suppression of TORC1 signalling as  
2 control larvae in hypoxia (Fig2f, Suppl Fig 2c). We also explored a potential role for AMPK in hypoxia-  
3 mediated TOR regulation. AMPK is activated under hypoxia in mammalian cell culture and can  
4 suppress TORC1 signalling, in part by phosphorylating and inhibiting TSC2<sup>28,33,34</sup>. However, when we  
5 suppressed AMPK by expression of a Gal4-dependent AMPK inverted repeat transgene (*UAS-AMPK*  
6 */R*), we still saw that hypoxia exposure lead to an inhibition of TORC1 (Suppl Fig 2d). Together, our  
7 data suggest that the rapid suppression of TORC1 signalling upon hypoxia exposure in larvae requires  
8 TSC1/2 function but is independent of both HIF-1 alpha mediated transcription and AMPK activation.  
9

### 10 **Suppression of TORC1 signalling in the fat body is required for adaptation to hypoxia**

11 We next examined whether the suppression of overall TORC1 activity we observed was important for  
12 animal adaptation and tolerance to hypoxia during *Drosophila* development. Our approach was to  
13 genetically maintain TORC1 signalling in larvae exposed to hypoxia and then to examine the effects of  
14 this manipulation on animal growth, development and survival. To do this, we used the ubiquitous  
15 expression of *UAS-Rheb* with *da-Gal4* since we found this condition led to larvae maintaining TORC1  
16 activity under hypoxia (Fig 2c). We compared development in control (*da>+*) vs. Rheb overexpressing  
17 (*da>Rheb*) animals that were grown throughout their larval period from hatching in either normoxia or  
18 hypoxia. We first found that larval Rheb overexpression had no effect on overall survival to the pupal  
19 stage in either normoxia or hypoxia (Fig 3a). We next examined developmental rate by measuring the  
20 time to pupation. In normoxic conditions, we found that Rheb overexpression (*da>Rheb*) lead to a slight  
21 increase in developmental rate compared to control animals (*da>+*, Fig 3b). When raised in hypoxia, the  
22 *da>+* animals had an approximately two-day delay to pupation, and this developmental delay was even  
23 further exacerbated in *da>Rheb* animals. (Fig 3b). We also measured effects on overall body size at the  
24 end of larval development. We found that *da>Rheb* animals exhibited an increase in both wandering  
25 third instar larval weight (Fig 3c) and pupal volume (Fig 3d). These results are consistent with increased  
26 growth caused by modest elevation of TORC1 signalling. However, we found that when raised in  
27 hypoxia, the increase in size in *da>Rheb* animals was abolished (Fig 3c, d). Given that the *da>Rheb*  
28 pupae required an additional ~2 days of larval development to reach the same size as *da >+*, this  
29 indicates that the Rheb overexpressing animals actually had a reduced growth rate in hypoxia.  
30

31 Finally, we examined how maintaining TORC1 activity during larval development in hypoxia affects  
32 subsequent survival to adulthood. For these experiments, we maintained animals in either normoxia or  
33 hypoxia throughout their larval period and then switched them to normoxia and monitored their  
34 development. We first saw that animals carrying either the *da>Gal4* (*da>+*) or *UAS-Rheb* (*+>Rheb*)  
35 transgenes alone had no effect on viability in either normoxia or hypoxia (Suppl Fig 3a). We found that  
36 both *da>+* and *da>Rheb* animals grown in normoxia as larvae showed normal development to the  
37 pharate adult stage. Similarly, *da>+* animals grown in hypoxia as larvae also showed no significant  
38 change in development to pharate adults. In contrast, *da>Rheb* animals that were maintained in  
39 hypoxia during their larval period showed a marked lethality at the pupal stage with few animals  
40 developing to pharate adults (Fig 3d). When we further examined adult eclosion, we again saw that  
41 *da>Rheb* animals that were maintained in larval hypoxia showed almost complete lethality, but in this  
42 case the *da>Rheb* animals raised in normoxia also showed a reduction in eclosion, albeit to a much  
43 lesser extent than their hypoxia-raised counterparts. We repeated our Rheb overexpression  
44 experiments with a second independent *UAS-Rheb* transgene and we observed similar, but slightly  
45 weaker effects, where *da>Rheb* animals grown in hypoxia as larvae showed a significant decrease in  
46 survival to adult stage compared to *da>+* animals (Suppl Fig 3b).  
47

48 Taken together, these experiments using ubiquitous expression of Rheb to maintain TORC1 signaling  
49 indicate that suppression of TORC1 is required for larvae to reset their development and growth rate in  
50 hypoxic environments, and for subsequent viable development to the adult stage.  
51

52 The adaptation to hypoxia may reflect a cell-autonomous requirement for each cell to sense low oxygen  
53 and inhibit TORC1 to promote overall development and survival. Alternatively, hypoxia may modulate  
54 TORC1 in one particular tissue to control overall body growth and development. A precedent for this is

1 the nutrient regulation of larval physiology and growth. For example, nutrient-dependent changes in  
2 TORC1 signalling in specific tissues such as the fat body or prothoracic gland can control whole animal  
3 growth and development through non-autonomous effects on endocrine signaling. In this manner, one  
4 tissue functions as a sensor of environmental stimuli to coordinate whole body responses. To examine  
5 a potentially similar role in hypoxia sensing, we examined whether TORC1 suppression in a specific  
6 tissue was required for hypoxia tolerance in developing *Drosophila*. To do this we again took the  
7 approach of expressing a *UAS-Rheb* transgene to maintain TORC1 signaling under hypoxia, but this  
8 time we restricted Rheb expression to specific larval tissues. We chose to examine effects on hypoxia  
9 tolerance by maintaining animals in either normoxia or hypoxia during their larval period and then  
10 measuring survival to eclosion. We tested Gal4 drivers that express in the fat body (*r4-Gal4*), neurons  
11 (*elav-Gal4*), the intestine (*MyoIA-Gal4*), the prothoracic gland (*P0206-Gal4*) and the muscle (*dmef2-*  
12 *Gal4*). We found the most dramatic effects were seen with fat-specific expression of Rheb: *r4>Rheb*  
13 animals grown in hypoxia during their larval stage showed a significant decrease in adult survival  
14 compared to *r4>+* control animals (Fig 4a). However, in contrast to ubiquitous expression of Rheb, we  
15 found that fat body restricted expression did not delay larval development in hypoxia - *r4>Rheb* animals  
16 developed slightly faster to the pupal stage in both normoxia and hypoxia compared to control (*r4>+*)  
17 animals. Also, *r4>Rheb* animals showed no significant change in final pupal size compared to *r4>+*  
18 animals. When we performed similar experiments with expression of Rheb in either neurons, intestine  
19 or prothoracic gland we saw no effect on viability (Fig 4b-d). Animals expressing Rheb in muscle  
20 (*dmef2>Rheb*) did show reduced adult survival when grown in hypoxia as larvae, however they also  
21 showed reduced survival in normoxia, making the effects on hypoxia tolerance difficult to interpret (Fig  
22 4e).

23  
24 These results suggest that the larval fat body is an important hypoxia sensing tissue that responds to  
25 low oxygen by suppressing TORC1 activity to ensure subsequent viable development. We therefore  
26 focused our attention on understanding how reduced TORC1 signaling in the fat body contributes to  
27 hypoxia tolerance.

### 28 29 **Suppression of TORC1 signalling in the fat body leads to increases in lipid droplet size 30 and lipid storage.**

31 We next examined how reduction of TORC1 signaling in the larval fat body contributes to normal  
32 organismal development and survival in hypoxia. The role of the fat body as a coordinator of overall  
33 body physiology and development has been best studied in the context of altered dietary nutrients. In  
34 particular, when larvae are starved of nutrients the fat body mobilizes stored sugars and lipids in order  
35 to maintain circulating levels of these nutrients and support tissue homeostasis<sup>9,10</sup>. Upon starvation, fat  
36 body cells also rapidly engage autophagy to promote organismal survival<sup>17</sup>. We therefore examined  
37 whether these changes are associated with exposure to low oxygen. We first examined autophagy  
38 since this is a well-studied conserved process known to be induced by TORC1 inhibition. We subjected  
39 early third instar larvae to hypoxia for six hours and then stained fat bodies with LysoTracker Red to  
40 visualize lysosomes and late stage autophagosomes as an indicator of autophagy. We also stained fat  
41 bodies from larvae maintained in normoxia and from larvae subjected to six hours of nutrient starvation,  
42 a condition known to induce autophagy. We found that fat bodies from normoxic animals showed little  
43 staining with LysoTracker Red, while starved fat bodies showed a marked increase in LysoTracker Red  
44 punctae, consistent with induction of autophagy (Fig 5). In contrast, we saw little or no LysoTracker Red  
45 punctae in fat bodies from larvae exposed to hypoxia for six hours (Fig 5). Even longer hypoxia  
46 exposure (24 hours) also did not induced autophagy.

47  
48 We then explored effects on lipid metabolism. In the fat body, triacylglycerol (TAGs) are stored within  
49 large lipid droplets. These lipid stores then can be mobilized under starvation conditions to supply a  
50 source of free fatty acid for beta-oxidation and other metabolic processes required for homeostasis<sup>35</sup>.  
51 We observed that when larvae were raised in hypoxia they showed a noticeable change in fat body  
52 morphology, which became less opaque in appearance as has been reported previously<sup>36</sup>. When we  
53 examined the fat bodies under light microscopy we saw an increase in cytoplasmic lipid droplet size  
54 (Fig 6a). We examined this phenotype in more detail by using Nile Red to stain the neutral lipids that

1 compose these cytoplasmic lipid droplets. When we transferred second instar larvae to hypoxia for two  
2 days we observed a significant increase lipid droplet diameter compared to larvae maintained in  
3 normoxia for the same period (Fig 6b, c). This effect on lipid droplets was opposite to that seen in larvae  
4 that were starved of all nutrients for two days (PBS only), which exhibited a marked decrease in lipid  
5 droplet size (Fig 6b). Instead, the hypoxia phenotype was similar to animals that were transferred to a  
6 sugar-only diet for two days. These results indicate that the effects of hypoxia on lipid droplet size are  
7 opposite to those seen in nutrient-deprivation and suggest that under hypoxia larvae may increase TAG  
8 levels through increase synthesis from dietary sugars. To measure TAG levels more quantitatively, we  
9 raised larvae from hatching in either normoxia or hypoxia and then measured whole-body TAG levels  
10 using a colorimetric assay. We found that hypoxic animals exhibited approximately a two-fold increase  
11 on total TAG levels when corrected for total larval weight (Fig 6d). We additionally used a previously  
12 described sucrose solution buoyancy assay to estimate larval lipid content<sup>37,38</sup>. In this assay groups of  
13 isolated wandering third instar larvae are mixed with increasing concentrations of a sucrose solution  
14 and the percentage of larvae floating at each concentration is measured. Using this approach, we found  
15 that hypoxic larvae were more buoyant than larvae grown in normoxia, consistent with an increase in  
16 lipids as a proportion of total body mass (Fig 6e). Altogether, these results indicate that hypoxia induces  
17 a remodelling of lipid droplet and an increase in total lipid storage.

18  
19 We next examined whether these changes in lipid metabolism occurred as a consequence of reduced  
20 TORC1 activity. To test this, we generated GFP-marked fat body *tsc1* mutant cell clones. As we  
21 previously described, loss of TSC1 completely reversed the hypoxia-mediated suppression of TORC1  
22 signaling. Hence, we examined these *tsc1* mutant fat body cells to see if they still showed the hypoxia-  
23 mediated changes in lipid droplets. We induced clones during mitosis in the embryo and then when the  
24 animals hatched we transferred them to hypoxia for their entire larval development. When we dissected  
25 and examined the fat bodies from third instar larvae using DIC microscopy, we observed the hypoxia  
26 increase in lipid droplet size in all non-GFP cells (Fig 7). However, the *tsc1* mutant cells showed no  
27 increase in lipid droplet size. Instead they maintained the small lipid droplet morphology typical of  
28 normoxic animals at the same stage even though the animals had been grown in hypoxia for several  
29 days (Fig 7). These data indicate suppression of TORC1 signalling is required of the hypoxia-mediate  
30 remodelling of lipid storage.

### 31 32 **Reorganization of lipid metabolism is required for hypoxia tolerance.**

33 We next examined whether the changes in lipid storage caused by the hypoxia-mediated suppression  
34 of fat body TORC1 signaling was important for development and survival. To do this we used genetic  
35 knockdown of *Lsd2*, a *Drosophila* perilipin homolog<sup>39-41</sup>. *Lsd2* is a protein associated with the surface of  
36 lipid droplets that is necessary for normal lipid droplet formation. We used expression of an inverted  
37 repeat (IR) to *Lsd2* (*UAS-Lsd2 IR*) to specifically knockdown *Lsd2* in the fat body using the *r4-Gal4*  
38 driver. When we did this and then transferred animals to hypoxia for two days, we found that the large  
39 lipid droplet phenotype seen in control (*r4>+*) animals was blocked when *Lsd2* levels were reduced  
40 (*r4>Lsd2 IR*; Fig 8a). We then explored how this inhibition of lipid droplet size affected tolerance to  
41 hypoxia. We maintained *r4>+* and *r4>Lsd2 IR* larvae in hypoxia from larval hatching to pupation, and  
42 then switched them back to normoxia and monitored viability to adult stage. We found that the *r4>Lsd2*  
43 *IR* showed a significant reduction in survival compared to *r4>+* control animals (Fig 8b). To confirm this  
44 effect, we also examined a previously reported *Lsd2* mutant allele (*Lsd2*<sup>KG00149</sup>). These *Lsd2* mutants are  
45 viable and show normal development when grown on normal laboratory food in normoxia. However,  
46 when we maintained these *Lsd2* mutants in hypoxia throughout their larval period, they showed a  
47 marked reduction in survival to adult stage compared to control (*w*<sup>1118</sup>) animals (Fig 8c). These results  
48 indicate that the increase in lipid droplet size caused by reduced TORC1 is required for organismal  
49 adaptation to hypoxia.

## 50 51 **DISCUSSION**

52  
53 In this paper, we explored how *Drosophila* are able to tolerate hypoxia. A central finding of our work is  
54 that when larvae are exposed to low oxygen, the fat body serves as a key hypoxia sensor that mediates

1 changes in physiology to ensure viable organismal development. This hypoxia sensor role is mediated  
2 through inhibition of TORC1 signaling and reorganization of lipid storage. This function of the fat body  
3 as a hypoxia sensor is reminiscent of the role of the fat body is coordinating whole body physiology  
4 responses to changes in dietary nutrients<sup>9,10,17,42,43</sup>. As we find in hypoxia, these nutrient effects are  
5 also dependent on modulation of TORC1 activity and they can exert both metabolic and endocrine  
6 effects to control growth and development. These studies and our findings in hypoxia, emphasize how  
7 the fat body functions a sentinel tissue to detect changes in environmental conditions and to buffer the  
8 internal milieu from these changes. Moreover, while most work on hypoxia has focused on studying  
9 cells in culture<sup>27,44</sup>, our findings emphasize the importance of non-cell autonomous mechanisms in  
10 controlling how animals adapt to low oxygen.

11  
12 Inhibition of TORC1 in larvae exposed to hypoxia occurred rapidly and, interestingly, only in response to  
13 a specific range of low oxygen (~2-6%). At <2% oxygen and lower, the response to hypoxia is very  
14 different compared to exposure to 5% oxygen that was used in this study - larvae crawl away from the  
15 food and eventually undergo complete movement arrest, which can be reversed within minutes of return  
16 to normoxia. Larvae can only tolerate this level of low oxygen (<2%) for a few hours before dying. Since  
17 this low oxygen hypoxic response is different to the behaviour of larvae at 5% oxygen (which maintain  
18 their feeding and growth) it may also rely on qualitatively different changes in hypoxia sensing and  
19 signaling that do not involve suppression of TORC1. The hypoxia-mediated inhibition of TORC1 that we  
20 found required TSC1/2 but was independent of two main mechanisms defined in mammalian cell  
21 culture experiments - induction of REDD1 by the well-studied HIF-1 alpha transcription factor or by  
22 activation of AMPK. Although the *Drosophila* homolog of REDD1, Scylla, was previously shown to be  
23 sufficient to inhibit TORC1<sup>32</sup>, we found that it was not necessary. Indeed, analysis of the REDD1  
24 mutant mouse also showed that in certain tissues, hypoxia-mediated repression of TORC1 was also  
25 REDD1-independent<sup>34</sup>. A previous report in cell culture showed that upon different stresses including  
26 hypoxia, TSC2 could translocate to the lysosome and inhibit Rheb activation of TORC1<sup>45</sup>. Therefore,  
27 upon hypoxia exposure in larvae, the TSC1/2 complex may rapidly re-localize to inhibit TORC1  
28 function. The mechanism that could drive this (or any other potential mechanism of TORC1 inhibition)  
29 must be triggered rapidly in response to hypoxia in larvae. Given the importance of oxygen as an  
30 electron acceptor in the electron transport chain in the mitochondria, it is plausible that the rapid  
31 sensing of low oxygen in larvae occurs as a result of altered mitochondrial activity. Two potential  
32 hypoxia effectors in this scenario are induction of reactive oxygen species or alterations in the levels of  
33 mitochondrial metabolites. For example, both 2-hydroxyglutarate and alpha ketoglutarate - metabolites  
34 in the TCA cycle - can alter TORC1 activity<sup>46,47</sup> and both can be induced by hypoxia in mammalian cell  
35 culture experiments<sup>48</sup>. How these changes could then subsequently lead to an increase in TSC1/2  
36 function and/or localization to inhibit TORC1 remains to be determined.

37  
38 We found that the protective effect of lowering adipose TORC1 signaling on hypoxia involved the  
39 reorganization of lipid metabolism. Hypoxic larvae increase their fat body lipid droplet size and their total  
40 proportion of whole body TAGs. This response is very different from starvation, a stress that also  
41 inhibits TORC1, where lipid droplet size is markedly reduced. This has been reported to be due to  
42 upregulation of lipases such as the ATGL lipase, Brummer<sup>49-51</sup>. This mechanism provides a way to  
43 generate a source of free fatty acids for beta-oxidation to maintain homeostasis and to allow survival  
44 under scarce nutrient conditions. In our experiments, the hypoxia induced lipid droplet phenotypes were  
45 similar to those seen when larvae were switched to a sugar only diet. One interpretation of this result is  
46 that under hypoxia larvae mobilize dietary glucose toward new TAG lipid synthesis and storage. Hence,  
47 the large lipid droplet and increased TAG levels seen in hypoxia may be primarily due to new TAG  
48 synthesis rather than a suppression of lipolysis. Our data also suggest that the effect of TORC1  
49 inhibition on lipid storage differs between the stress stimuli that suppress TORC1 (hypoxia vs  
50 starvation). Indeed, we also saw that decreased TORC1 activity in hypoxia did not trigger autophagy in  
51 the fat body in the same way that it does upon nutrient deprivation.

52  
53 One result we found interesting was that the suppression of fat body TORC1 and altered larval lipid  
54 storage was not necessary for viable larval development under hypoxia, but was required for



1 subsequent development in the pupal stage to produce viable adults. During the pupal stage, tissues  
2 undergo metamorphosis to establish the adult body. Since this is also a non-feeding stage of the life  
3 cycle, the energy required to fuel these extensive tissue rearrangements in pupae must therefore come  
4 from stored nutrients. It has been calculated that the lipid stores provide 90% of this energy<sup>52</sup>. Our  
5 findings suggest that pupae may be more dependent on these lipid stores after a period of prior larval  
6 hypoxia. Hence failure to maintain these stores, either by preventing TORC1 inhibition (Rheb  
7 overexpression) or genetic disruption of lipid droplet formation (Lsd2 knockdown), lead to reduced  
8 viability in hypoxia, while having no effect on normal development in normoxia. It is also possible that  
9 the requirement for altered lipid stores may reflect a role for lipid droplets beyond simply providing a  
10 usable energy source<sup>53</sup>. A pertinent example is a report describing how increases in glial lipid droplets  
11 in larvae were important for maintaining neuroblast cell proliferation in larvae exposed to hypoxia or  
12 oxidative stress<sup>54</sup>. In this case, the lipid droplets were required to play an antioxidant role to buffer  
13 neurons from ROS-induced damage. Mammalian cancer cells in culture have also been shown to  
14 accumulate lipid droplets in low oxygen, an effect that is important to promote their survival and  
15 tumorigenic phenotypes in mouse models<sup>55</sup>. Cancer cells with high levels of TORC1 activity have also  
16 been shown to be dependent on exogenous fatty acids for their survival in hypoxic conditions<sup>56,57</sup>. Hence,  
17 the lipid droplet phenotypes we observed may be important for ensuring cell and tissue viability in pupal  
18 stages independent of any role in energy production.

19  
20 In conclusion, our studies presented here pinpoint the *Drosophila* fat body as a key hypoxia sensing  
21 tissue that ensures viable animal development in low oxygen. We suggest that, given the importance of  
22 the fat body as a regulator of adult *Drosophila* physiology, this hypoxia-sensing role may be a general  
23 mechanism of low oxygen tolerance throughout *Drosophila* life.

## 24 25 **METHODS**

### 26 ***Drosophila* stocks**

27 Flies were raised on standard medium containing 150 g agar, 1600 g cornmeal, 770 g Torula yeast, 675  
28 g sucrose, 2340 g D-glucose, 240 ml acid mixture (propionic acid/phosphoric acid) per 34 L water and  
29 maintained at 25°C, unless otherwise indicated. The following fly stocks were used:

30  
31 *w<sup>1118</sup>, tsc1<sup>Q87X</sup>/TM6B<sup>58</sup>, sima<sup>07607</sup>/TM3,Ser,GFP<sup>21</sup>, scylla/TM3,Ser,GFP<sup>32</sup>, charybdis<sup>180</sup>/TM3*  
32 *<sup>32</sup>,Ser,GFP, lsd2<sup>KG00149</sup>, UAS-AMPK RNAi (VDRC), UAS-Rheb (Bloomington Stock Centre), UAS-Lsd2*  
33 *RNAi (Bloomington Stock Centre, #), da-Gal4, r4-Gal4, P0206-Gal4, Elav-Gal4, Myo1A-Gal4, dmef2-*  
34 *GAL4.*

35  
36 For all GAL4/UAS experiments, homozygous GAL4 lines were crossed to the relevant UAS line(s) and  
37 the larval or adult progeny were analyzed. Control animals were obtained by crossing the relevant  
38 homozygous GAL4 line to flies of the same genetic background as the particular experimental UAS  
39 transgene line.

### 40 41 **Hypoxia exposure**

42 For all hypoxia experiments (except for those shown in Figure 2b) *Drosophila* were exposed to 5%  
43 oxygen. This was achieved by placing vials containing *Drosophila* into an airtight glass chamber into  
44 which a mix of 5% oxygen/95% nitrogen continually flowed. Flow rate was controlled using an Aalborg  
45 model P gas flow meter. Alternatively, for some experiments *Drosophila* vials were placed into a Coy  
46 Laboratory Products in vitro O<sub>2</sub> chamber that was maintained at fixed oxygen levels of 1-20%  
47 (depending on the nature of the experiment: See Figure 2b and Suppl Fig 2b) by injection of nitrogen  
48 gas.

### 49 50 **Preparation of protein extracts.**

51 *Drosophila* larvae were lysed with a buffer containing 20 mM Tris-HCl (pH 8.0), 137 mM NaCl, 1 mM  
52 EDTA, 25 % glycerol, 1% NP-40 and with following inhibitors 50 mM NaF, 1 mM PMSF, 1 mM DTT, 5  
53 mM sodium ortho vanadate (Na<sub>3</sub>VO<sub>4</sub>) and Protease Inhibitor cocktail (Roche Cat. No. 04693124001)  
54 and Phosphatase inhibitor (Roche Cat. No. 04906845001), according to the manufacturer instructions.

## Western blots and antibodies.

Protein concentrations were measured using the Bio-Rad Dc Protein Assay kit II (5000112). Protein lysates (15 µg to 30µg) were resolved by SDS-PAGE and electro transferred to a nitrocellulose membrane, subjected to Western blot analysis with specific antibodies, and visualized by chemiluminescence (enhanced ECL solution (Perkin Elmer). Primary antibodies used in this study were: anti-phospho-S6K-Thr398 (Cell Signalling Technology #9209 ), anti-eIF2 alpha (AbCam #26197), anti-S6K a gift from Aurelio Teleman), anti-actin (Sant Cruz Biotechnology, # sc-8432). Secondary antibodies were purchased from SantaCruz Biotechnology (sc-2030, 2005, 2020). For experiments looking at TORC1 activity, either total eIF2 alpha, actin or total S6K levels were used as loading controls because the levels of these proteins were unaffected by hypoxia.

## Measurement of *Drosophila* development, growth and survival.

*Development timing to pupal stage:* newly hatched larvae were collected at 24hr AEL and placed in food vials (50 larvae per vial). The number of pupae was counted each day. For each experimental condition, a minimum of 5 replicates was used to calculate the mean percentage of pupae per time point.

*Larval growth:* newly hatched larvae were collected at 24hr AEL and placed in food vials (50 larvae per vial) and then maintained in either normoxia or hypoxia. Larvae were then imaged on each day of development using a Zeiss Discovery.V8 Stereomicroscope with Axiovision imaging software. For Fig1A, images of larvae were taken on different days. The larval images were then cropped and arranged as shown in the figure.

*Larval Weight:* Third instar larvae were washed in PBS, dried thoroughly on paper and then weighed in groups of ten using a microbalance.

*Pupal Volume:* Pupae were imaged using a Zeiss Discovery.V8 Stereomicroscope with Axiovision imaging software. Pupal length and width were measured and pupal volume was calculated using the formula,  $\text{volume} = 4/3\pi(L/2)(l/2)^2$

## LysoTracker and Nile red staining.

Fat bodies were dissected from larvae and incubated in either Nile Red (1:50,000 dilution of a 10% stock in DMSO, ThermoFisher Scientific, N1142) or LysoTracker (1:1000, Thermofisher Scientific, L7528) for 10 mins on glass slides. Fat bodies were then immediately imaged using a Zeiss Observer Z1 microscope using Axiovision software.

## Lipid measurements

Groups of ten larvae were washed in PBS, dried on filter paper and then weighed. Total TAG levels were determined as described in detail in<sup>59</sup>. The calculated TAG levels were then corrected for larval weight to give a measure of total TAG levels per microgram of larval weight. The buoyancy assay was carried out as described in detail in<sup>38</sup>.

## Statistical analyses.

Data were analyzed by Students t-test, or two-way ANOVA followed by post-hoc students t-test where appropriate. All statistical analysis and data plots were performed using Prism software. In all figures, statistically significant differences are presented as: \* p<0.05.

## ACKNOWLEDGEMENTS.

We thank Paula Bellosta, Aurelio Teleman, Hugo Stocker, Ernst Hafen, Bruce Edgar and Iswar Hariharan for the gift of reagents and fly stocks. Stocks obtained from the VDRC, the NIG-Fly Stock Centre, Kyoto, Japan and the Bloomington *Drosophila* Stock Center (NIH P40OD018537) were used in this study. This work was supported by a CIHR operating grant and a NSERC Discovery grant to S.S.G. E.C.B. was supported by Alberta Innovates Health Solutions Graduate Studentship.

## 1 REFERENCES

- 2 1. Hamdoun, A. & Epel, D. Embryo stability and vulnerability in an always changing world. *Proc Natl Acad Sci U S A* **104**, 1745-50 (2007).
- 3 2. Gilbert, S.F. Developmental Plasticity and Developmental Symbiosis: The Return of Eco-Devo. *Curr Top Dev Biol* **116**, 415-33 (2016).
- 4 3. Semenza, G.L. Oxygen sensing, homeostasis, and disease. *N Engl J Med* **365**, 537-47 (2011).
- 5 4. Bickler, P.E. & Buck, L.T. Hypoxia tolerance in reptiles, amphibians, and fishes: life with variable oxygen availability. *Annu Rev Physiol* **69**, 145-70 (2007).
- 6 5. Ramirez, J.M., Folkow, L.P. & Blix, A.S. Hypoxia tolerance in mammals and birds: from the wilderness to the clinic. *Annu Rev Physiol* **69**, 113-43 (2007).
- 7 6. Clegg, J. Embryos of *Artemia franciscana* survive four years of continuous anoxia: the case for complete metabolic rate depression. *J Exp Biol* **200**, 467-75 (1997).
- 8 7. Park, T.J. *et al.* Fructose-driven glycolysis supports anoxia resistance in the naked mole-rat. *Science* **356**, 307-311 (2017).
- 9 8. Mirth, C.K. & Piper, M.D. Matching complex dietary landscapes with the signalling pathways that regulate life history traits. *Curr Opin Genet Dev* **47**, 9-16 (2017).
- 10 9. Koyama, T. & Mirth, C.K. Unravelling the diversity of mechanisms through which nutrition regulates body size in insects. *Curr Opin Insect Sci* **25**, 1-8 (2018).
- 11 10. Boulan, L., Milan, M. & Leopold, P. The Systemic Control of Growth. *Cold Spring Harb Perspect Biol* **7**(2015).
- 12 11. Church, R.B. & Robertson, F.W. Biochemical analysis of genetic differences in the growth of *Drosophila*. *Genet Res* **7**, 383-407 (1966).
- 13 12. Britton, J.S. & Edgar, B.A. Environmental control of the cell cycle in *Drosophila*: nutrition activates mitotic and endoreplicative cells by distinct mechanisms. *Development* **125**, 2149-58. (1998).
- 14 13. Grewal, S.S. Insulin/TOR signaling in growth and homeostasis: a view from the fly world. *Int J Biochem Cell Biol* **41**, 1006-10 (2009).
- 15 14. Saxton, R.A. & Sabatini, D.M. mTOR Signaling in Growth, Metabolism, and Disease. *Cell* **168**, 960-976 (2017).
- 16 15. Danielsen, E.T., Moeller, M.E. & Rewitz, K.F. Nutrient signaling and developmental timing of maturation. *Curr Top Dev Biol* **105**, 37-67 (2013).
- 17 16. Juhasz, G., Erdi, B., Sass, M. & Neufeld, T.P. Atg7-dependent autophagy promotes neuronal health, stress tolerance, and longevity but is dispensable for metamorphosis in *Drosophila*. *Genes Dev* **21**, 3061-6 (2007).
- 18 17. Scott, R.C., Schuldiner, O. & Neufeld, T.P. Role and regulation of starvation-induced autophagy in the *Drosophila* fat body. *Dev Cell* **7**, 167-78 (2004).
- 19 18. Zhou, D. & Haddad, G.G. Genetic analysis of hypoxia tolerance and susceptibility in *Drosophila* and humans. *Annu Rev Genomics Hum Genet* **14**, 25-43 (2013).
- 20 19. Callier, V., Hand, S.C., Campbell, J.B., Biddulph, T. & Harrison, J.F. Developmental changes in hypoxic exposure and responses to anoxia in *Drosophila melanogaster*. *J Exp Biol* **218**, 2927-34 (2015).
- 21 20. Heinrich, E.C., Farzin, M., Klok, C.J. & Harrison, J.F. The effect of developmental stage on the sensitivity of cell and body size to hypoxia in *Drosophila melanogaster*. *J Exp Biol* **214**, 1419-27 (2011).
- 22 21. Centanin, L., Ratcliffe, P.J. & Wappner, P. Reversion of lethality and growth defects in Fatiga oxygen-sensor mutant flies by loss of hypoxia-inducible factor-alpha/Sima. *EMBO Rep* **6**, 1070-5 (2005).
- 23 22. Lavista-Llanos, S. *et al.* Control of the hypoxic response in *Drosophila melanogaster* by the basic helix-loop-helix PAS protein similar. *Mol Cell Biol* **22**, 6842-53 (2002).
- 24 23. Zhou, D. *et al.* Mechanisms underlying hypoxia tolerance in *Drosophila melanogaster*: hairy as a metabolic switch. *PLoS Genet* **4**, e1000221 (2008).
- 25 24. Li, Y. *et al.* HIF- and non-HIF-regulated hypoxic responses require the estrogen-related receptor in *Drosophila melanogaster*. *PLoS Genet* **9**, e1003230 (2013).

- 1 25. Wingrove, J.A. & O'Farrell, P.H. Nitric oxide contributes to behavioral, cellular, and  
2 developmental responses to low oxygen in *Drosophila*. *Cell* **98**, 105-14 (1999).
- 3 26. Teodoro, R.O. & O'Farrell, P.H. Nitric oxide-induced suspended animation promotes survival  
4 during hypoxia. *EMBO J* **22**, 580-7 (2003).
- 5 27. Schito, L. & Rey, S. Cell-Autonomous Metabolic Reprogramming in Hypoxia. *Trends Cell Biol*  
6 **28**, 128-142 (2018).
- 7 28. Liu, L. *et al.* Hypoxia-induced energy stress regulates mRNA translation and cell growth. *Mol*  
8 *Cell* **21**, 521-31 (2006).
- 9 29. Nakazawa, M.S., Keith, B. & Simon, M.C. Oxygen availability and metabolic adaptations. *Nat*  
10 *Rev Cancer* **16**, 663-73 (2016).
- 11 30. Wouters, B.G. & Koritzinsky, M. Hypoxia signalling through mTOR and the unfolded protein  
12 response in cancer. *Nat Rev Cancer* **8**, 851-64 (2008).
- 13 31. Brugarolas, J. *et al.* Regulation of mTOR function in response to hypoxia by REDD1 and the  
14 TSC1/TSC2 tumor suppressor complex. *Genes Dev* **18**, 2893-904 (2004).
- 15 32. Reiling, J.H. & Hafen, E. The hypoxia-induced paralogs Scylla and Charybdis inhibit growth by  
16 down-regulating S6K activity upstream of TSC in *Drosophila*. *Genes Dev* **18**, 2879-92 (2004).
- 17 33. Inoki, K., Zhu, T. & Guan, K.L. TSC2 mediates cellular energy response to control cell growth  
18 and survival. *Cell* **115**, 577-90 (2003).
- 19 34. Wolff, N.C. *et al.* Cell-type-dependent regulation of mTORC1 by REDD1 and the tumor  
20 suppressors TSC1/TSC2 and LKB1 in response to hypoxia. *Mol Cell Biol* **31**, 1870-84 (2011).
- 21 35. Palanker, L., Tennessen, J.M., Lam, G. & Thummel, C.S. *Drosophila* HNF4 regulates lipid  
22 mobilization and beta-oxidation. *Cell Metab* **9**, 228-39 (2009).
- 23 36. Wong, D.M., Shen, Z., Owyang, K.E. & Martinez-Agosto, J.A. Insulin- and warts-dependent  
24 regulation of tracheal plasticity modulates systemic larval growth during hypoxia in *Drosophila*  
25 *melanogaster*. *PLoS One* **9**, e115297 (2014).
- 26 37. Hazegh, K.E. *et al.* An autonomous metabolic role for Spen. *PLoS Genet* **13**, e1006859 (2017).
- 27 38. Hazegh, K.E. & Reis, T. A Buoyancy-based Method of Determining Fat Levels in *Drosophila*. *J*  
28 *Vis Exp* (2016).
- 29 39. Gronke, S. *et al.* Control of fat storage by a *Drosophila* PAT domain protein. *Curr Biol* **13**, 603-6  
30 (2003).
- 31 40. Teixeira, L., Rabouille, C., Rorth, P., Ephrussi, A. & Vanzo, N.F. *Drosophila* Perilipin/ADRP  
32 homologue Lsd2 regulates lipid metabolism. *Mech Dev* **120**, 1071-81 (2003).
- 33 41. Welte, M.A. *et al.* Regulation of lipid-droplet transport by the perilipin homolog LSD2. *Curr Biol*  
34 **15**, 1266-75 (2005).
- 35 42. Colombani, J. *et al.* A nutrient sensor mechanism controls *Drosophila* growth. *Cell* **114**, 739-49  
36 (2003).
- 37 43. Geminard, C., Rulifson, E.J. & Leopold, P. Remote control of insulin secretion by fat cells in  
38 *Drosophila*. *Cell Metab* **10**, 199-207 (2009).
- 39 44. Xie, H. & Simon, M.C. Oxygen availability and metabolic reprogramming in cancer. *J Biol Chem*  
40 **292**, 16825-16832 (2017).
- 41 45. Demetriades, C., Plescher, M. & Teleman, A.A. Lysosomal recruitment of TSC2 is a universal  
42 response to cellular stress. *Nat Commun* **7**, 10662 (2016).
- 43 46. Fu, X. *et al.* 2-Hydroxyglutarate Inhibits ATP Synthase and mTOR Signaling. *Cell Metab* **22**,  
44 508-15 (2015).
- 45 47. Chin, R.M. *et al.* The metabolite alpha-ketoglutarate extends lifespan by inhibiting ATP synthase  
46 and TOR. *Nature* **510**, 397-401 (2014).
- 47 48. Intlekofer, A.M. *et al.* Hypoxia Induces Production of L-2-Hydroxyglutarate. *Cell Metab* **22**, 304-  
48 11 (2015).
- 49 49. Choi, S., Lim, D.S. & Chung, J. Feeding and Fasting Signals Converge on the LKB1-SIK3  
50 Pathway to Regulate Lipid Metabolism in *Drosophila*. *PLoS Genet* **11**, e1005263 (2015).
- 51 50. Gronke, S. *et al.* Brummer lipase is an evolutionary conserved fat storage regulator in  
52 *Drosophila*. *Cell Metab* **1**, 323-30 (2005).
- 53 51. Gronke, S. *et al.* Dual lipolytic control of body fat storage and mobilization in *Drosophila*. *PLoS*  
54 *Biol* **5**, e137 (2007).

- 1 52. Merkey, A.B., Wong, C.K., Hoshizaki, D.K. & Gibbs, A.G. Energetics of metamorphosis in  
2 *Drosophila melanogaster*. *J Insect Physiol* **57**, 1437-45 (2011).
- 3 53. Welte, M.A. & Gould, A.P. Lipid droplet functions beyond energy storage. *Biochim Biophys Acta*  
4 **1862**, 1260-1272 (2017).
- 5 54. Bailey, A.P. *et al.* Antioxidant Role for Lipid Droplets in a Stem Cell Niche of *Drosophila*. *Cell*  
6 **163**, 340-53 (2015).
- 7 55. Bensaad, K. *et al.* Fatty acid uptake and lipid storage induced by HIF-1alpha contribute to cell  
8 growth and survival after hypoxia-reoxygenation. *Cell Rep* **9**, 349-365 (2014).
- 9 56. Young, R.M. *et al.* Dysregulated mTORC1 renders cells critically dependent on desaturated  
10 lipids for survival under tumor-like stress. *Genes Dev* **27**, 1115-31 (2013).
- 11 57. Ackerman, D. & Simon, M.C. Hypoxia, lipids, and cancer: surviving the harsh tumor  
12 microenvironment. *Trends Cell Biol* **24**, 472-8 (2014).
- 13 58. Tapon, N., Ito, N., Dickson, B.J., Treisman, J.E. & Hariharan, I.K. The *Drosophila* tuberous  
14 sclerosis complex gene homologs restrict cell growth and cell proliferation. *Cell* **105**, 345-55  
15 (2001).
- 16 59. Tennessen, J.M., Barry, W.E., Cox, J. & Thummel, C.S. Methods for studying metabolism in  
17 *Drosophila*. *Methods* **68**, 105-15 (2014).
- 18
- 19

## FIGURE LEGENDS

**Figure 1. Hypoxia inhibits larval growth and development.** **a)** Larvae were hatched in normoxia and then either maintained in normoxia (top images) or transferred to hypoxia (5% oxygen, bottom images). Larvae and pupae were then subsequently imaged on each day following egg hatching. Hypoxia leads to a delay in larval growth and development. **b)** Larvae were hatched in normoxia and then maintained in either normoxia or hypoxia (5% oxygen) until the wandering third instar stage. Larval weights were then measured. Hypoxia leads to a reduction in larval mass. Data are expressed as mean  $\pm$  SEM. \* =  $p < 0.05$ . **c)** Larvae were hatched in normoxia and then maintained in either normoxia or hypoxia (5% oxygen) until pupation. Pupal size was then measured. Hypoxia leads to a reduction in final pupal size. Data are expressed as mean  $\pm$  SEM, \* =  $p < 0.05$ .

**Figure 2. Hypoxia suppresses TORC1 signalling via TSC1/2.** **a)** Early third instar larvae were transferred from normoxia to hypoxia (5% oxygen). At the indicated times, larvae were then collected, lysed and processed for SDS-PAGE and western blotting using antibodies to phospho-S6K (pS6K) or total eIF2 $\alpha$  (eIF2 $\alpha$ ). Hypoxia led to a rapid suppression of TORC1 signalling. **b)** Early third instar larvae were transferred from normoxia to different levels of hypoxia (20-1% oxygen) for 2hrs. Larvae were then collected, lysed and processed for SDS-PAGE and western blotting using antibodies to phospho-S6K (pS6K) or total eIF2 $\alpha$  (eIF2 $\alpha$ ). Suppression of TORC1 signalling was only seen at oxygen concentrations between 1 and 5%. **c)** Control (*da > +*) or Rheb overexpressing (*da > Rheb*) early third instar larvae were either maintained in normoxia (N) or transferred from normoxia to hypoxia (5% oxygen, H) for 2hrs. Larvae were then collected, lysed and processed for SDS-PAGE and western blotting using antibodies to phospho-S6K (pS6K) or total eIF2 $\alpha$  (eIF2 $\alpha$ ). Overexpression of Rheb was sufficient to maintain TORC1 signalling in hypoxia larvae at levels seen in normoxic animals. **d)** Control (*w<sup>1118</sup>*) or *tsc1* mutant (*tsc1<sup>Q87X</sup>*) larvae were either maintained in normoxia (N) or transferred from normoxia to hypoxia (5% oxygen, H) for 2hrs. Larvae were then collected, lysed and processed for SDS-PAGE and western blotting using antibodies to phospho-S6K (pS6K) or total eIF2 $\alpha$  (eIF2 $\alpha$ ). Hypoxia-mediated suppression of TORC1 signalling required *tsc1* function. **e)** Control (*w<sup>1118</sup>*) or *sima* mutant (*sima*) larvae were either maintained in normoxia (N) or transferred from normoxia to hypoxia (5% oxygen, H) for 2hrs. Larvae were then collected, lysed and processed for SDS-PAGE and western blotting using antibodies to phospho-S6K (pS6K) or total S6K. Hypoxia-mediated suppression of TORC1 signalling occurred independently of *sima* function. **f)** Control (*w<sup>1118</sup>*) or *scylla* mutant (*scylla*) larvae were either maintained in normoxia (N) or transferred from normoxia to hypoxia (5% oxygen, H) for 2hrs. Larvae were then collected, lysed and processed for SDS-PAGE and western blotting using antibodies to phospho-S6K (pS6K) or total eIF2 $\alpha$  (eIF2 $\alpha$ ). Hypoxia-mediated suppression of TORC1 signalling occurred independently of *scylla* function.

**Figure 3. Suppression of TORC1 is required for adaptation to hypoxia.** **(a-d)** Control (*da > +*) or Rheb overexpressing (*da > Rheb*) animals were maintained in either normoxia or hypoxia (5% oxygen) throughout the larval period. **a)** Survival to the pupal stage was measured by calculating the percentage of larvae that developed to pupae for each experimental condition. **b)** The rate of larval development was measured by calculating the percentage of animals that progressed to the pupal stage over time. Maintaining TORC1 signalling in larvae during hypoxia led to a further delay in pupation. **c)** Weights of wandering third instar larvae were measured for each experimental condition. Maintaining TORC1 signalling in hypoxia did not increase larval growth. Data are presented as box plots (25%, median and 75% values) with error bars indicating the min and max values. N=6 groups of larvae per condition. **d)** Pupal volume was calculated for each experimental condition. Maintaining TORC1 signalling in larvae during hypoxia did not increase final pupal size. Data are presented as box plots (25%, median and 75% values) with error bars indicating the min and max values. N > 100 pupae per condition. \* =  $p < 0.05$ . **e, f)** Control (*da > +*) or Rheb overexpressing (*da > Rheb*) animals were maintained in either normoxia or hypoxia (5% oxygen) throughout the larval period, before being returned to normoxia at the pupal stage. The % of animals that developed to **e)** pharate adults, or **f)** eclosed adults were then calculated. Maintaining TORC1 signalling in larvae during hypoxia led to a subsequent lethality during pupal development. Data are presented as box plots (25%, median and

1 75% values) with error bars indicating the min and max values. N= 6-8 independent groups of animals  
2 (50 animals per group) per experimental condition. \* =  $p < 0.05$ .

3  
4 **Figure 4. Suppression of TORC1 in the fat body is required for adaptation to hypoxia. a)**

5 Control ( $r4 > +$ ) larvae or larvae overexpressing Rheb in the fat body ( $r4 > Rheb$ ) were maintained in  
6 either normoxia or hypoxia (5% oxygen) throughout the larval period and then were returned to  
7 normoxia at the beginning of the pupal stage. The percentage of animals that eclosed as viable adults  
8 was then measured. Animals expressing Rheb in the fat body and exposed to hypoxia as larvae  
9 showed a significant decrease in adult survival. Data are presented as box plots (25%, median and 75%  
10 values) with error bars indicating the min and max values. N= 4-7 groups of animals (50 animals per  
11 group) per experimental condition. \* =  $p < 0.05$ . **b-e)** Rheb was overexpressed in larval neurons (**c**,  $elav$   
12  $> Rheb$ ), the intestine (**d**,  $MyoIA > Rheb$ ), the prothoracic gland (**e**,  $P0206 > Rheb$ ) or muscle (**f**,  $dmef2$   
13  $> Rheb$ ). Animals were hatched in normoxia and then maintained throughout the larval period in either  
14 normoxic or hypoxic conditions, before being returned to normoxia at the pupal stage. The percentage  
15 of animals that developed to the adult stage was calculated for each experimental condition. Control  
16 animals carried the Gal4 transgene alone. Data are presented as box plots (25%, median and 75%  
17 values) with error bars indicating the min and max values. N= 4-8 independent groups of animals (50  
18 animals per group) per experimental condition. \* =  $p < 0.05$ .

19  
20 **Figure 5. Hypoxia does not induce autophagy.** Early third instar larvae were maintained in  
21 normoxia (left panels), transferred to hypoxia for 6 hours (middle panels), or starved on PBS for 6 hours  
22 (right panels). Fat bodies were then dissected, stained with LysoTracker and then imaged. Red =  
23 LysoTracker; blue = Hoechst DNA stain. Scale bar =  $50\mu\text{m}$ . Starvation, but not hypoxia, induced  
24 autophagy in the fat body.

25  
26 **Figure 6. Hypoxia alters lipid levels and lipid storage. a)** Larvae were hatched in normoxia  
27 and then maintained throughout the larval period in either normoxic or hypoxic conditions. Fat bodies  
28 from third instar larvae were then imaged using DIC microscopy. Blue = Hoechst DNA stain. Hypoxia  
29 lead to an increase in lipid droplet size in fat body cells. Scale bar =  $50\mu\text{m}$  **b)** w1118 larvae were grown  
30 in normoxia for until 72 hrs after egg laying at which point they were transferred to one of four  
31 experimental conditions for 48 hours: (i) normoxia, (ii) hypoxia, (iii) sugar only diet, (iv) complete  
32 starvation (PBS) diet). Fat bodies were then dissected, stained with Nile Red and then imaged. Red +  
33 Nile Red, blue = Hoechst DNA dye. Hypoxia lead to an increase in lipid droplet size, similar to a sugar  
34 only diet. Scale bar =  $50\mu\text{m}$  **c)** Lipid droplet size from fat bodies represented in Bi and Bii were  
35 measured and presented as mean diameter  $\pm$  SEM. **d)** Larvae were hatched in normoxia and then  
36 maintained throughout the larval period in either normoxic or hypoxic conditions. Total TAG levels from  
37 third instar larvae from both experimental conditions were then measured. Hypoxia exposure lead to an  
38 increase in larval total TAG levels. Data are presented as mean  $\pm$  SEM. **e)** Larvae were hatched in  
39 normoxia and then maintained throughout the larval period in either normoxic or hypoxic conditions.  
40 Larval lipid content was then estimated in wandering third instar larvae using an assay, which measures  
41 the percentage of larvae that float in increasing amounts of a sucrose solution. Hypoxia-exposed larvae  
42 floated at lower concentrations of sucrose compared to normoxic larvae, indicative of a higher lipid  
43 content in hypoxic larvae.

44  
45 **Figure 7. TORC1 suppression is required for hypoxia-induced modulation of lipid**

46 **storage.** The MARCM system was used to generate GFP-marked  $tsc1$  mutant cell clones in the fat  
47 body. Hatched larvae were then either maintained in normoxia or transferred to hypoxia. At the third  
48 instar stage, larval fat bodies were fixed, dissected and mounted on coverslips. Fat bodies were then  
49 imaged using DIC microscopy to visualize lipid droplets. Blue = Hoechst DNA dye.

50  
51 **Figure 8: Reorganization of lipid droplets is required for adaptation to hypoxia. a)**

52 Control larvae ( $r4 > +$ ) or larvae expressing an inverted repeat RNAi transgene to Lsd2 ( $r4 > Lsd2 IR$ )  
53 were transferred to hypoxia at 72hrs. After 48 hours of hypoxia, fat bodies were dissected and stained  
54 with Nile Red. RNAi-mediated knockdown of Lsd2 inhibited the increase in lipid droplet size caused by

1 hypoxia. Scale bar = 50 $\mu$ m **b)** Control larvae ( $r4 > +$ ) or larvae expressing an inverted repeat RNAi  
2 transgene to *Lsd2* ( $r4 > Lsd2 IR$ ) were maintained in hypoxia throughout the larval period from hatching to  
3 pupation. Animals were then returned to normoxia and the percentage of eclosed adults counted.  
4 RNAi-mediated knockdown of *Lsd2* lead to decreased adult survival. Data are presented as box plots  
5 (25%, median and 75% values) with error bars indicating the min and max values. N= 4-8 groups of  
6 animals (50 animals per group) per experimental condition. \* =  $p < 0.05$ . **c)** Control ( $w^{1118}$ ) or *Lsd2* mutant  
7 (*Lsd2KG*) larvae were maintained in hypoxia throughout the larval period from hatching to pupation.  
8 Animals were then returned to normoxia and the percentage of eclosed adults counted. *Lsd2* mutant  
9 animals show decreased survival to adult stage. Data are presented as box plots (25%, median and  
10 75% values) with error bars indicating the min and max values. N= 4-8 independent groups of animals  
11 (50 animals per group) per experimental condition. \* =  $p < 0.05$ .

12  
13 **Supplemental Figure 1. Animals exposed to hypoxia maintain normal food intake.** Early  
14 third instar larvae were placed into vials containing food mixed with blue food dye. The vials were then  
15 either maintained in normoxia or placed into hypoxia for one hour. Larvae were then imaged using a  
16 Zeiss Stereomicroscope. The larvae exposed to hypoxia showed similar levels of food intake as larvae  
17 maintained in hypoxia.

18  
19 **Supplemental Figure 2. Hypoxia-dependent suppression of TORC1 signaling is**  
20 **independent of AMPK and Charybdis.** **a)** Early third instar larvae were either maintained in  
21 normoxia or transferred from normoxia to hypoxia (5% oxygen) for 40 hours. Larvae were then  
22 collected, lysed and processed for SDS-PAGE and western blotting using antibodies to phospho-S6K  
23 (pS6K) or actin. **b)** Early third instar larvae were transferred from normoxia to different levels of hypoxia  
24 (20-1% oxygen) for 2hrs. Larvae were then collected, lysed and processed for SDS-PAGE and western  
25 blotting using antibodies to phospho-S6K (pS6K) or total eIF2alpha (eIF2 $\alpha$ ). **c)** control ( $w^{1118}$ ) or  
26 *charybdis* mutant larvae were either maintained in normoxia (N) or transferred from normoxia to hypoxia  
27 (5% oxygen, H) for 2hrs. Larvae were then collected, lysed and processed for SDS-PAGE and western  
28 blotting using antibodies to phospho-S6K (pS6K) or total eIF2alpha (eIF2 $\alpha$ ). **d)** Control ( $da > +$ ) or  
29 AMPK $\alpha$  RNAi overexpressing ( $da > AMPK\alpha IR$ ) early third instar larvae were either maintained in  
30 normoxia (N) or transferred from normoxia to hypoxia (5% oxygen, H) for 2hrs. Larvae were then  
31 collected, lysed and processed for SDS-PAGE and western blotting using antibodies to phospho-S6K  
32 (pS6K) or total eIF2alpha (eIF2 $\alpha$ ).

33  
34 **Supplemental Figure 3. Suppression of TORC1 is required for adaptation to hypoxia.** **a)**  
35 Larvae carrying either the *da-Gal4* ( $da > +$ ) or the *UAS-Rheb* ( $+ > Rheb$ ) transgene were maintained in  
36 either normoxia or hypoxia (5% oxygen) throughout the larval period and then were returned to  
37 normoxia at the beginning of the pupal stage. The percentage of animals that eclosed as viable adults  
38 was then measured. Data are presented as box plots (25%, median and 75% values) with error bars  
39 indicating the min and max values. N= 4-7 groups of animals (50 animals per group) per experimental  
40 condition. **b)** Control ( $da > +$ ) larvae or larvae overexpressing a second independent UAS-Rheb  
41 transgene ( $da > Rheb\#2$ ) were maintained in either normoxia or hypoxia (5% oxygen) throughout the  
42 larval period and then were returned to normoxia at the beginning of the pupal stage. The percentage of  
43 animals that eclosed as viable adults was then measured. Animals expressing Rheb and exposed to  
44 hypoxia as larvae showed a significant decrease in adult survival. Data are presented as box plots  
45 (25%, median and 75% values) with error bars indicating the min and max values. N= 4-7 independent  
46 groups of animals (50 animals per group) per experimental condition. \* =  $p < 0.05$ . **c)** Control ( $r4 > +$ )  
47 larvae or larvae overexpressing Rheb in the fat body ( $r4 > Rheb$ ) were maintained in either normoxia or  
48 hypoxia (5% oxygen) throughout the larval period. The rate of larval development was measured by  
49 calculating the percentage of animals that progressed to the pupal stage over time. Maintaining TORC1  
50 signalling in the larval fat body did not reverse the hypoxia-mediated delay in larval development. Data  
51 points represent mean  $\pm$  SEM, N>5 groups of animals per experimental condition. **d)** Control ( $r4 > +$ )  
52 larvae or larvae overexpressing Rheb in the fat body ( $r4 > Rheb$ ) were maintained in either normoxia or  
53 hypoxia (5% oxygen) throughout the larval period. Pupal volumes were then measured for each



1 experimental condition. Data are presented as box plots (25%, median and 75% values) with error bars  
2 indicating the min and max values. N >100 pupae per condition. \* = p<0.05.  
3

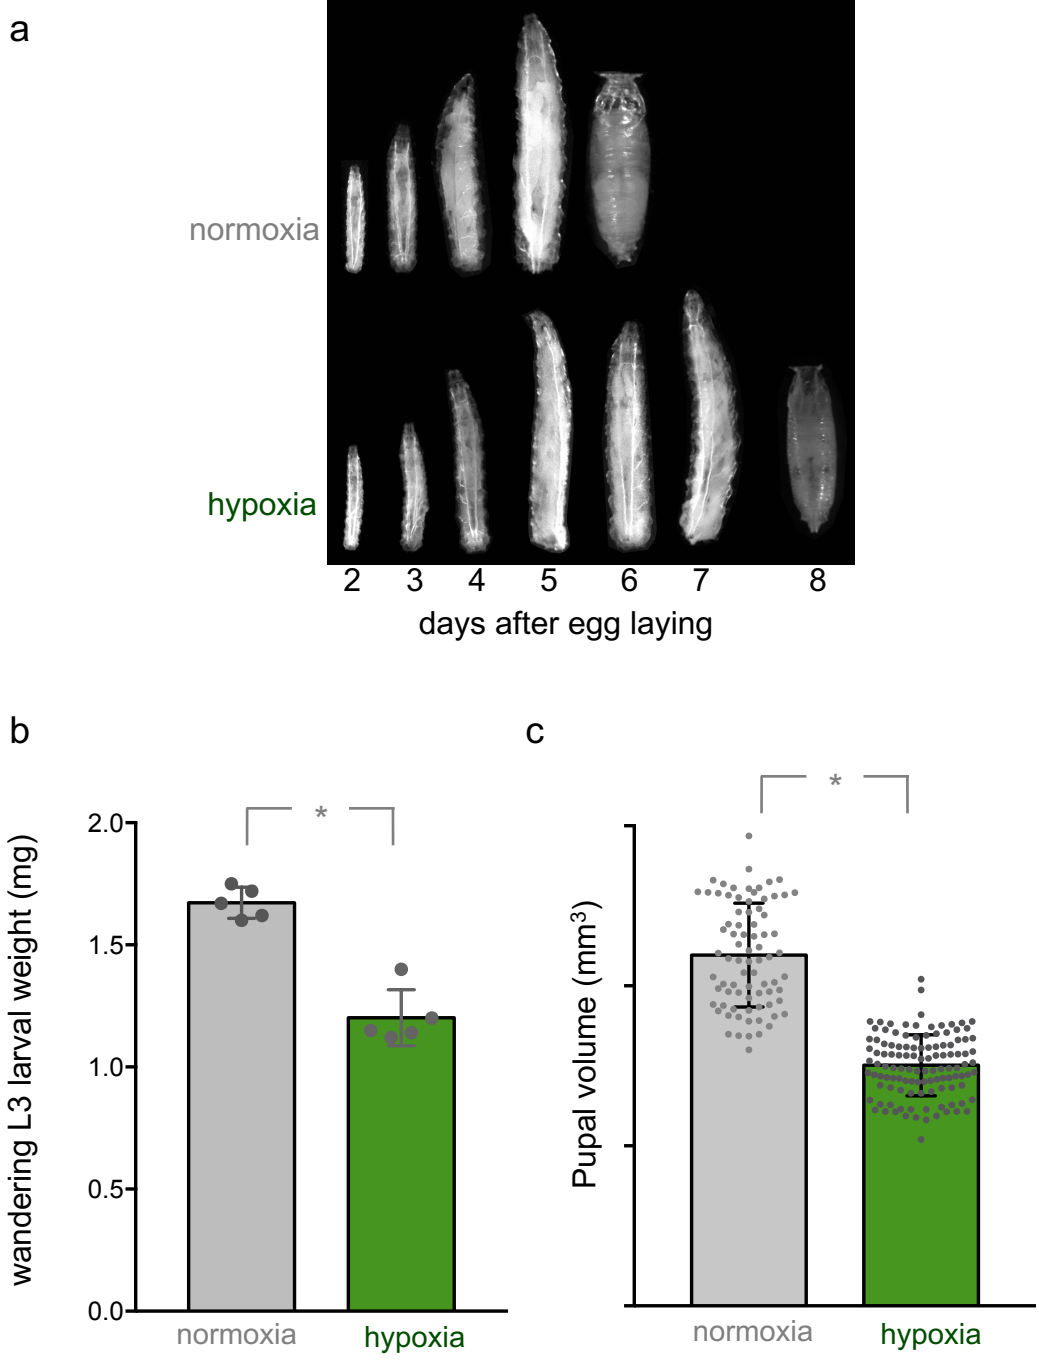

**Fig1. Hypoxia suppresses larval growth and development**

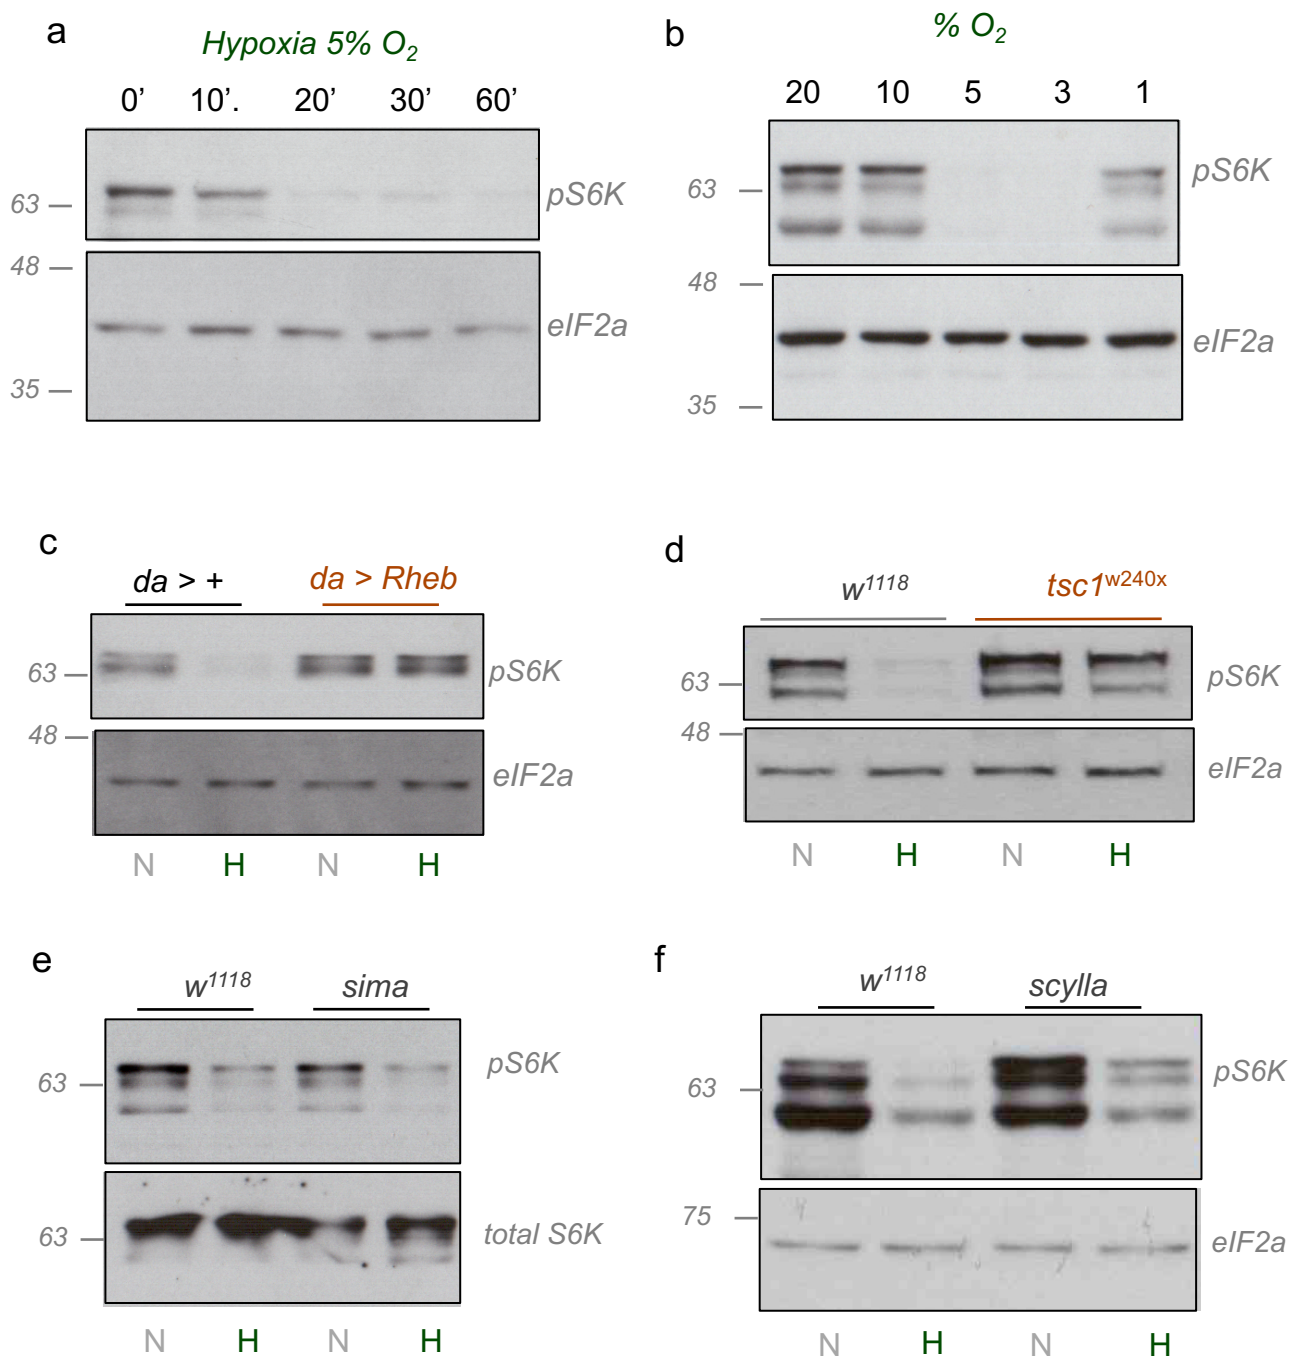

**Fig 2: Hypoxia suppresses TORC1 signaling via TSC1/2.**

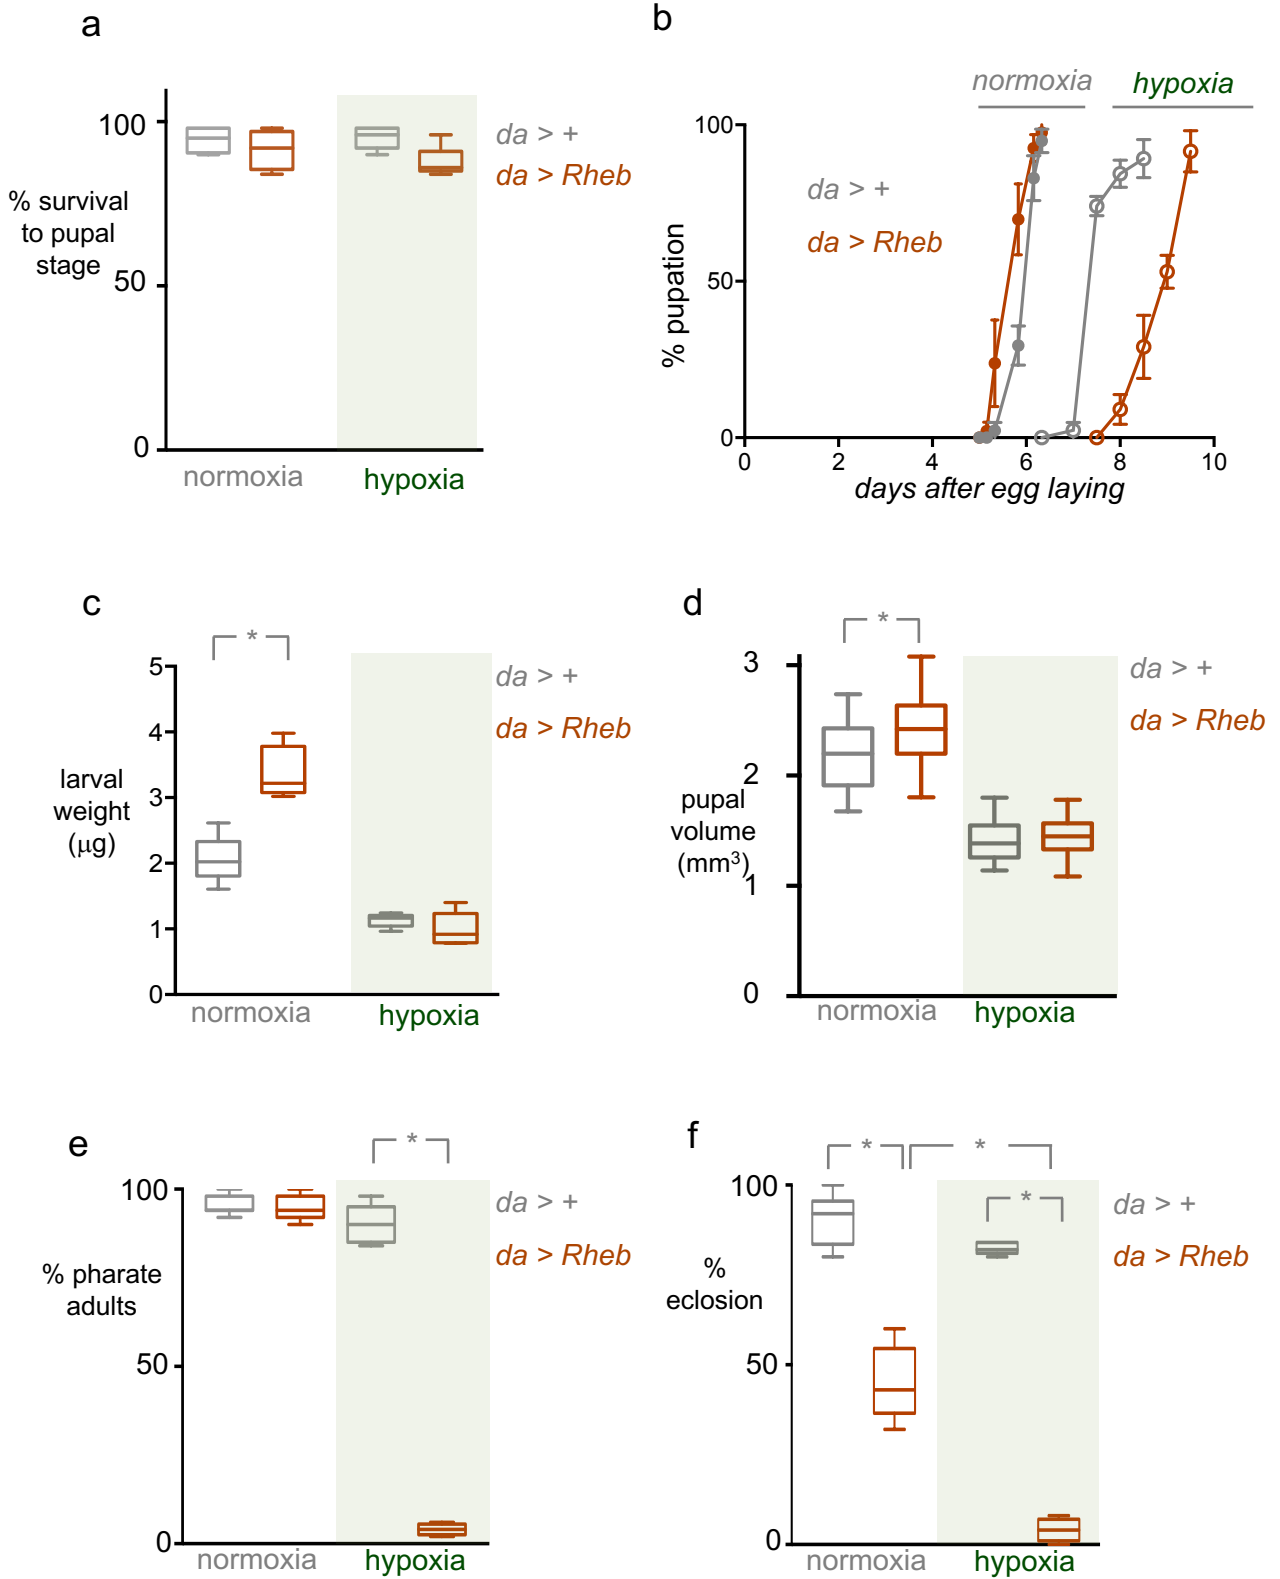

**Fig 3. Suppression of TOR is required for adaptation to hypoxia**

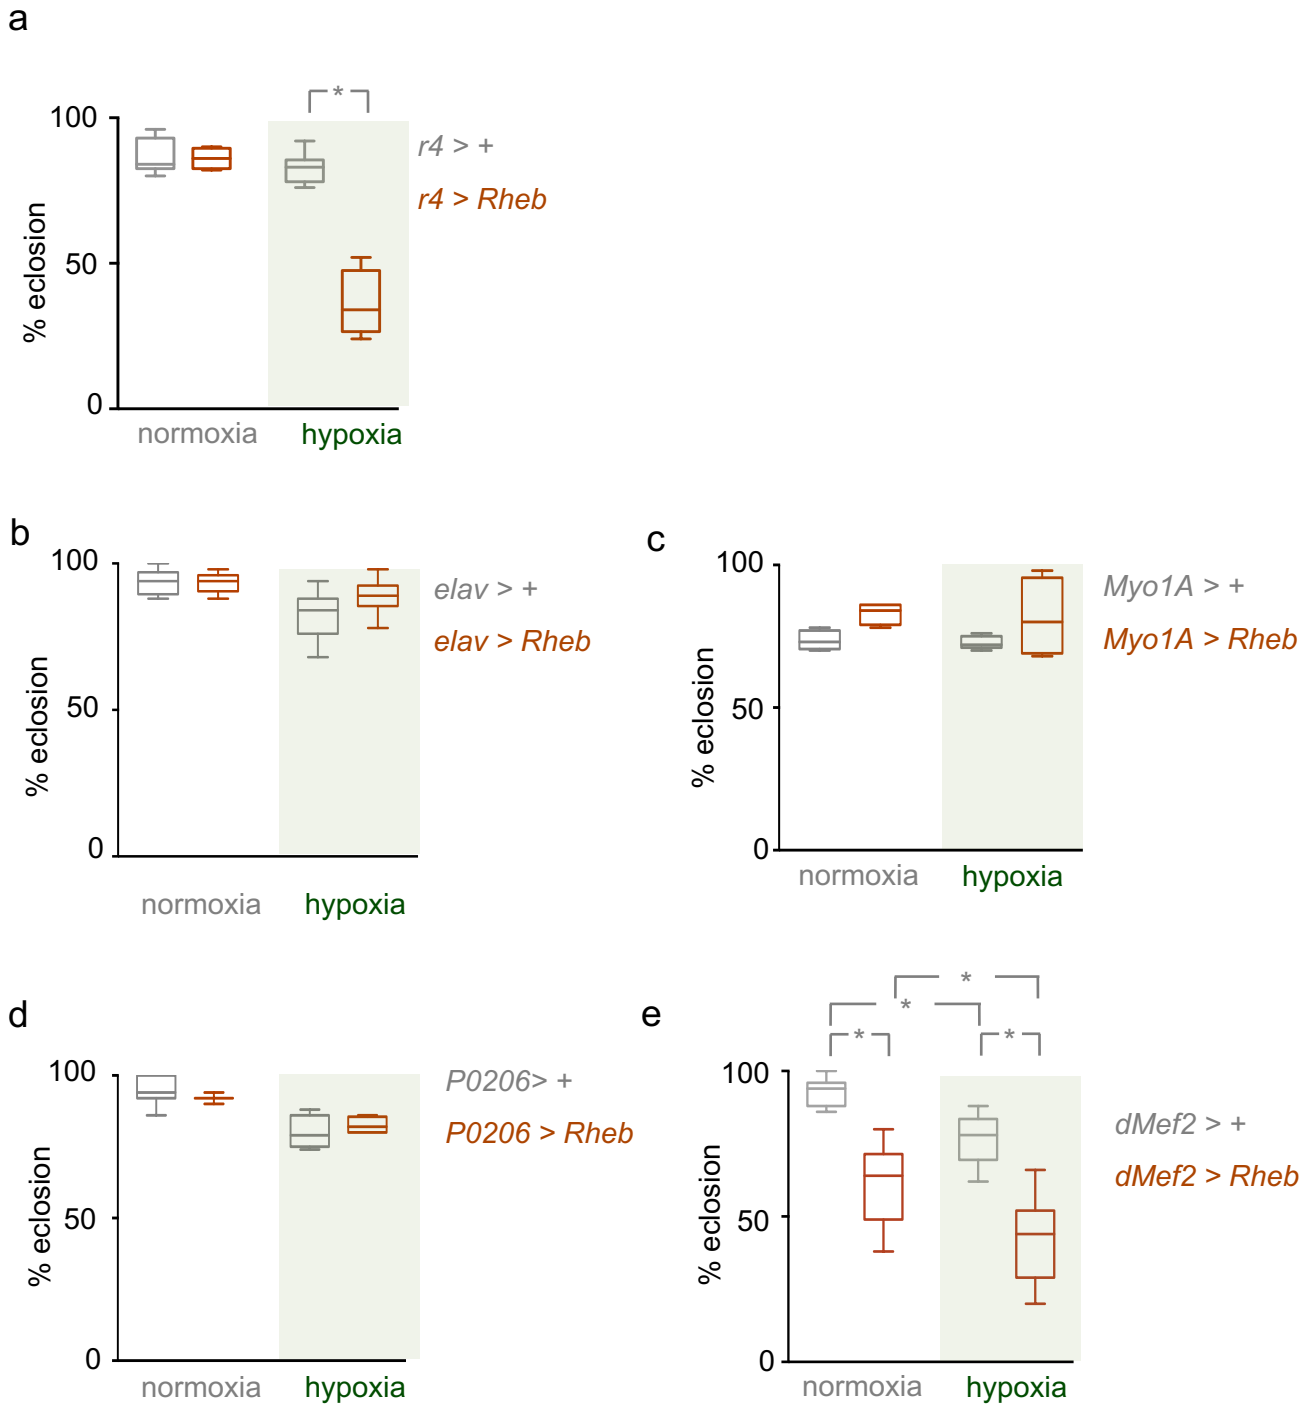

**Fig 4. Suppression of TORC1 in the fat body is required for organismal adaptation to hypoxia**

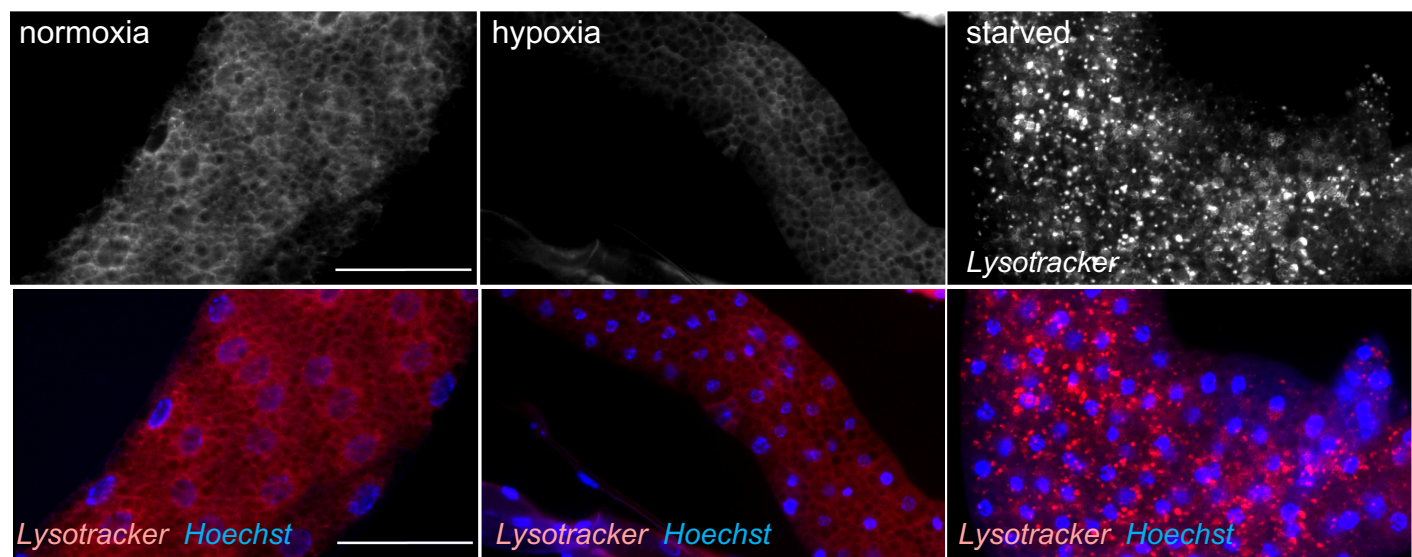

**Fig 5 Hypoxia has little effect on autophagy**

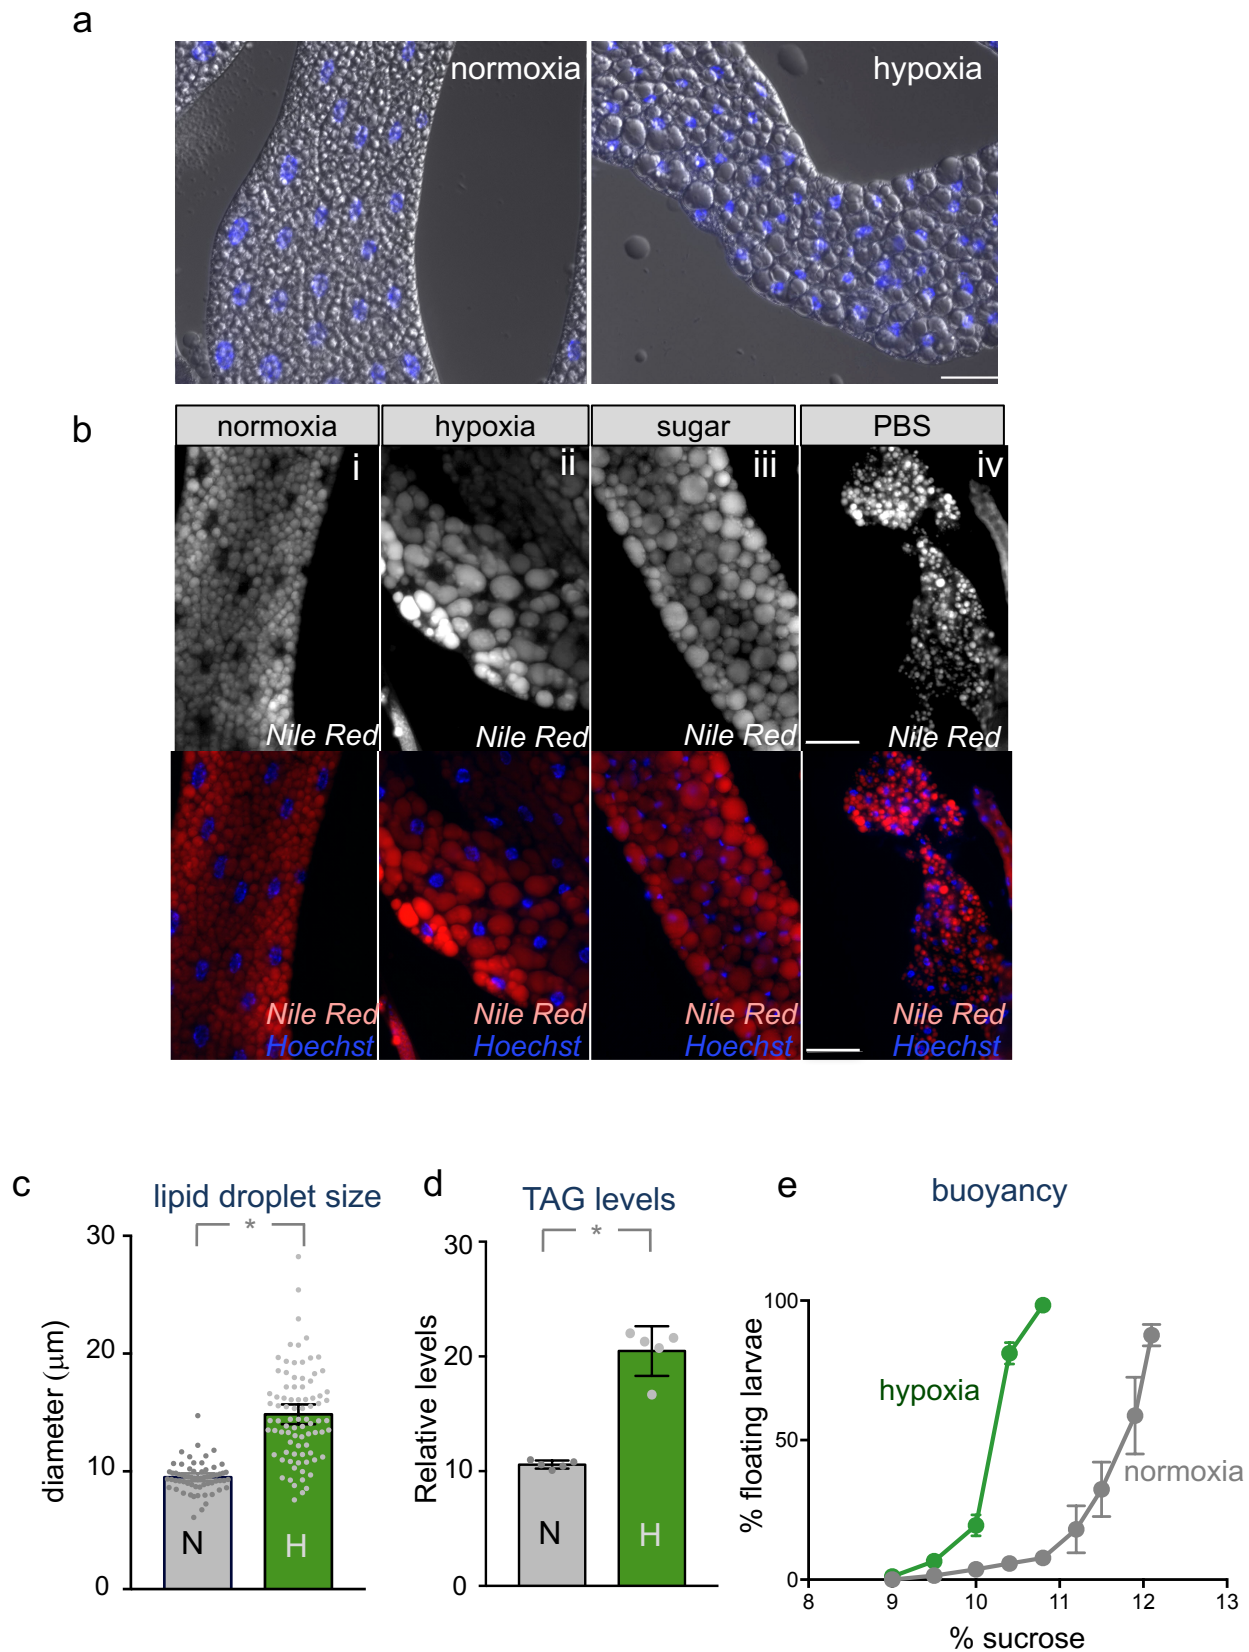

**Fig 6 Hypoxia alters larval lipid levels and storage**

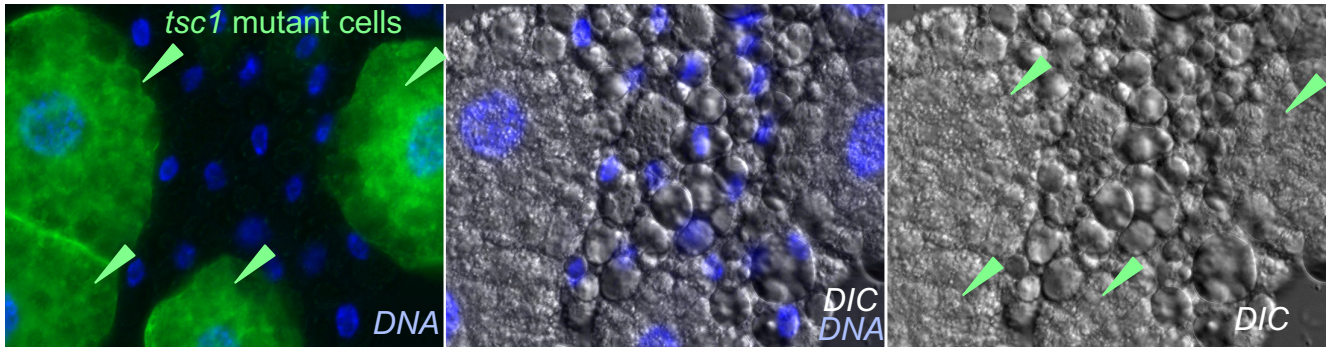

**Fig 7: Suppression of TORC1 is required for hypoxia-mediated changes in lipid storage**



a

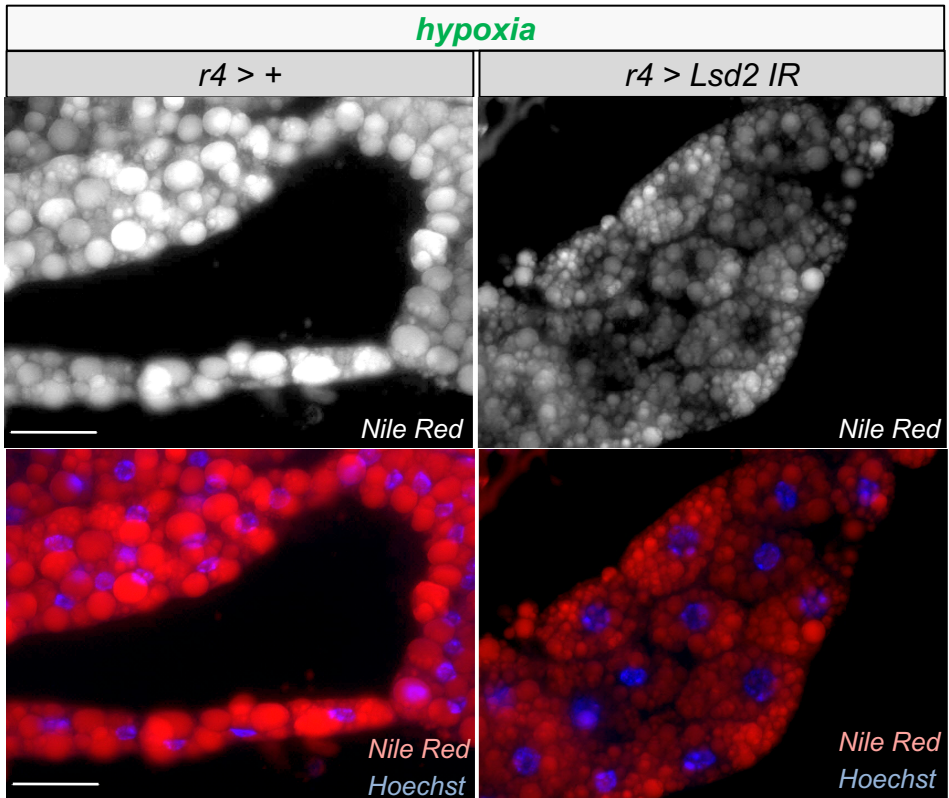

b

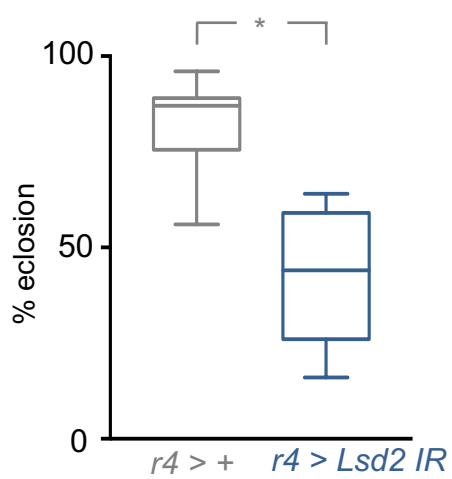

c

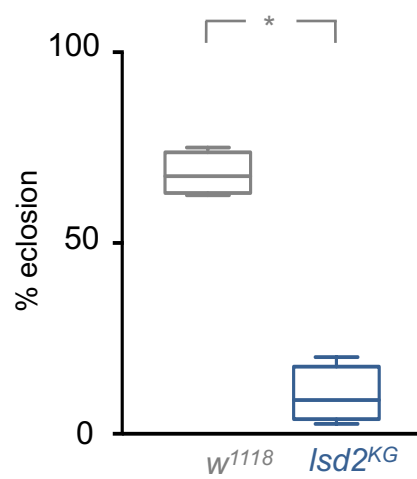

**Fig 8: Lipid droplet remobilization is required for hypoxia adaptation.**

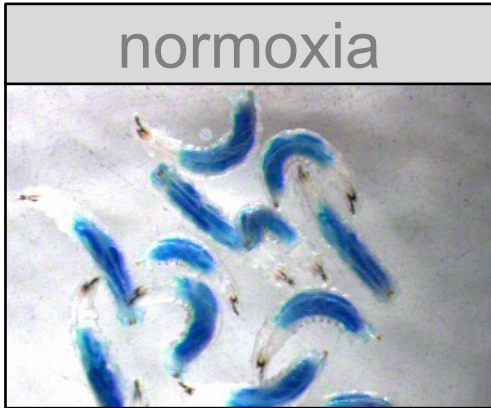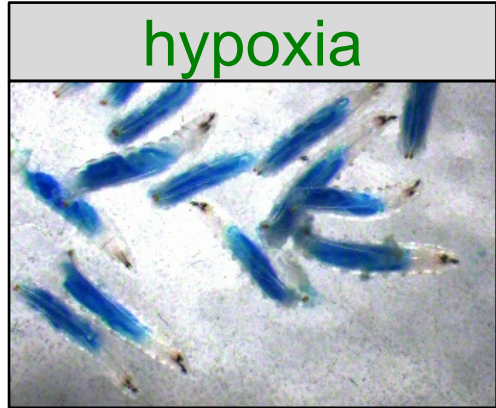

**Suppl Fig 1: Animals exposed to hypoxia maintain normal food intake**

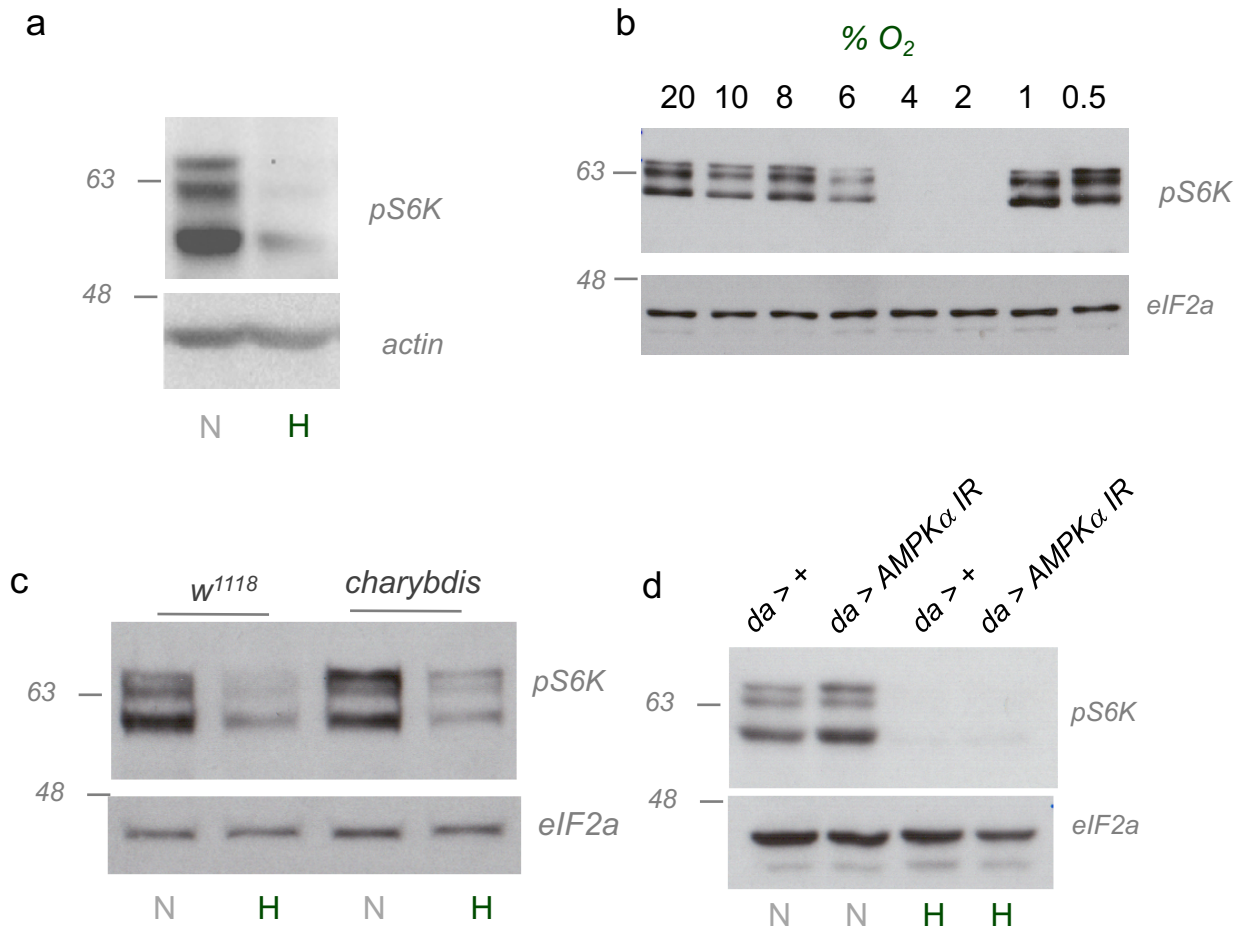

**Suppl Fig 2: Hypoxia-dependent suppression of TORC1 signaling is independent of AMPK and Charybdis.**

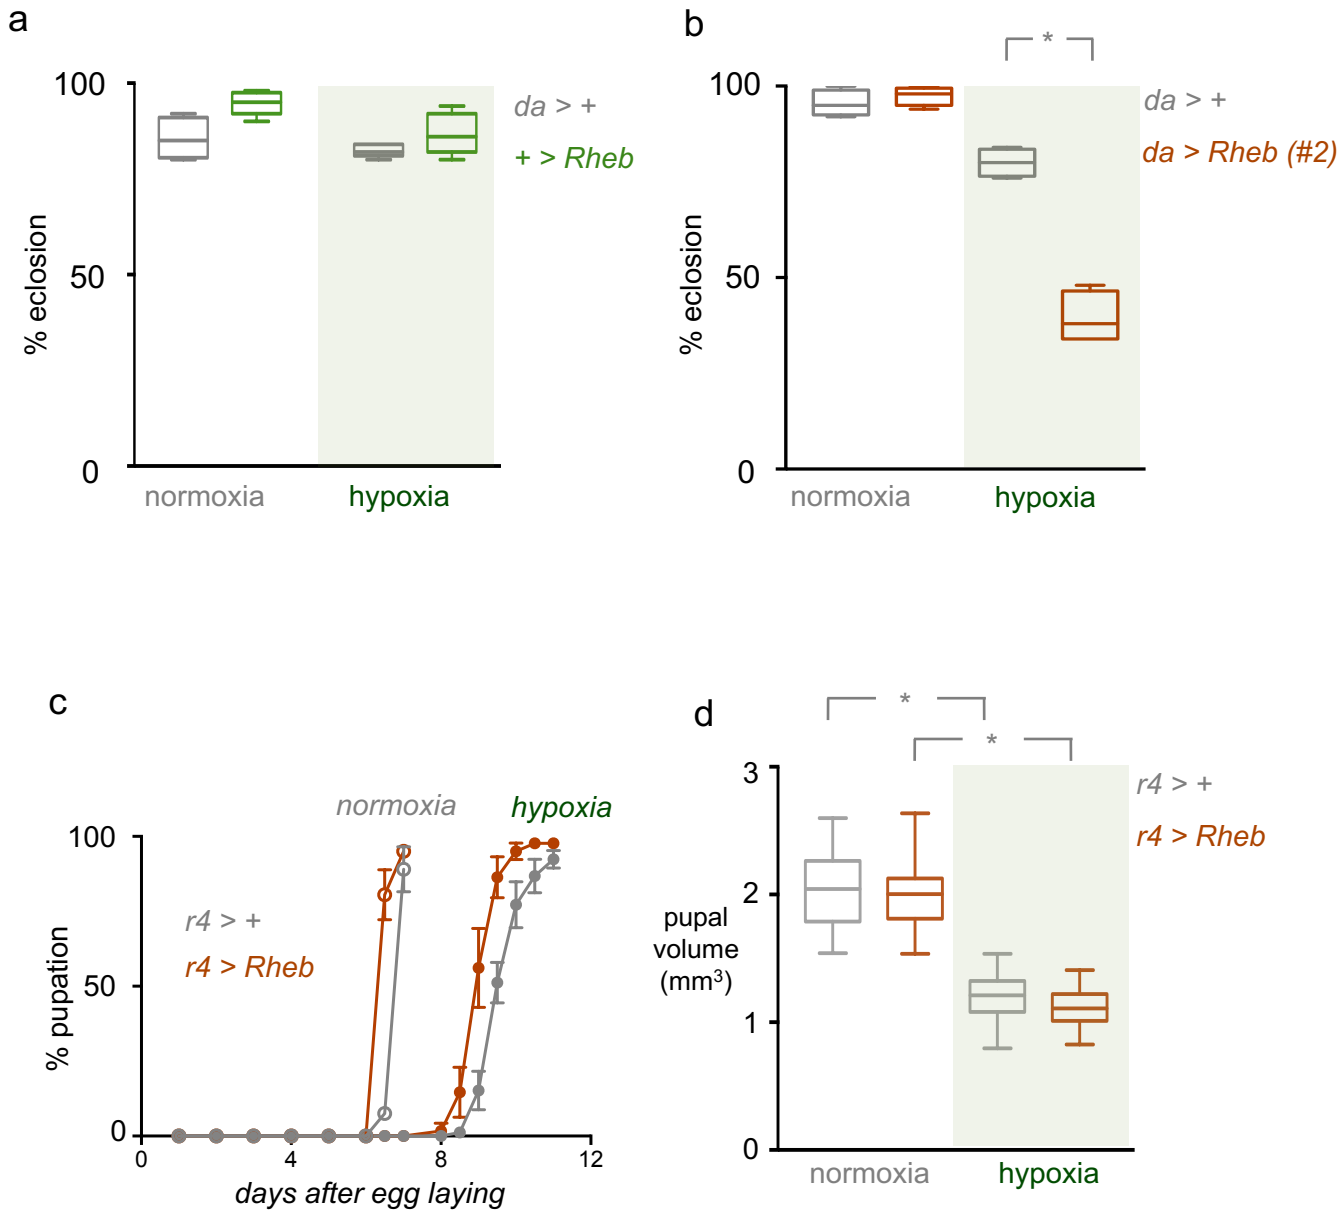

Suppl Fig 3. Suppression of TORC1 is required for adaptation to hypoxia
